# Supplementary material for: Tranexamic acid in cardiac surgery: a systematic review and meta-analysis (protocol)
Source: PubMed Central journal article supplement — BMJ Open. 2019 Sep 17;9(9):e028585. doi: 10.1136/bmjopen-2018-028585 (PMC6756438; doi:10.1136/bmjopen-2018-028585), 2019-09-17
Supplement: bmjopen-2018-028585.draft_revisions.pdf [file bmjopen-2018-028585.draft_revisions.pdf]

# BMJ Open

BMJ Open is committed to open peer review. As part of this commitment we make the peer review history of every article we publish publicly available.

When an article is published we post the peer reviewers' comments and the authors' responses online. We also post the versions of the paper that were used during peer review. These are the versions that the peer review comments apply to.

The versions of the paper that follow are the versions that were submitted during the peer review process. They are not the versions of record or the final published versions. They should not be cited or distributed as the published version of this manuscript.

BMJ Open is an open access journal and the full, final, typeset and author-corrected version of record of the manuscript is available on our site with no access controls, subscription charges or pay-per-view fees (<http://bmjopen.bmj.com>).

If you have any questions on BMJ Open's open peer review process please email [info.bmjopen@bmj.com](mailto:info.bmjopen@bmj.com)

# BMJ Open

## Tranexamic Acid in Cardiac Surgery: a systematic review and meta-analysis (protocol)

|                               |                                                                                                                                                                                                                                                                                                                                                                                                                                                                                                                                                                                                                                                                                                                                                                                                                                                                                                                                                                                                        |
|-------------------------------|--------------------------------------------------------------------------------------------------------------------------------------------------------------------------------------------------------------------------------------------------------------------------------------------------------------------------------------------------------------------------------------------------------------------------------------------------------------------------------------------------------------------------------------------------------------------------------------------------------------------------------------------------------------------------------------------------------------------------------------------------------------------------------------------------------------------------------------------------------------------------------------------------------------------------------------------------------------------------------------------------------|
| Journal:                      | <i>BMJ Open</i>                                                                                                                                                                                                                                                                                                                                                                                                                                                                                                                                                                                                                                                                                                                                                                                                                                                                                                                                                                                        |
| Manuscript ID                 | bmjopen-2018-028585                                                                                                                                                                                                                                                                                                                                                                                                                                                                                                                                                                                                                                                                                                                                                                                                                                                                                                                                                                                    |
| Article Type:                 | Protocol                                                                                                                                                                                                                                                                                                                                                                                                                                                                                                                                                                                                                                                                                                                                                                                                                                                                                                                                                                                               |
| Date Submitted by the Author: | 28-Jan-2019                                                                                                                                                                                                                                                                                                                                                                                                                                                                                                                                                                                                                                                                                                                                                                                                                                                                                                                                                                                            |
| Complete List of Authors:     | Alaifan, Thamer; McMaster University Department of Medicine, Alenazy, Ahmed; McMaster University Department of Medicine, critical care<br>Xiang Wang , Dominic; Western University Department of Medicine<br>Fernando, Shannon; University of Ottawa, Department of Emergency Medicine<br>Spence, Jessica; McMaster University, Departments of Anesthesia and Clinical Epidemiology and Biostatistics<br>Belley-Cote, Emilie; McMaster University; Universite de Sherbrooke, Medicine<br>Fox-Robichaud, Alison; McMaster University, Medicine<br>Ainswoth, Craig; McMaster University Department of Medicine, Critical care , cardiology<br>Karachi, Tim; McMaster University, Medicine<br>Kyeremanteng , Kwadwo ; University of Ottawa Faculty of Medicine, critical care<br>Zarychanski, Ryan ; University of Manitoba, Sections of Critical Care and Hematology/Medical Oncology<br>Whitlock, Richard; McMaster University, Surgery<br>Rochweg, Bram; McMaster University, Medicine (Critical Care) |
| Keywords:                     | Adult intensive & critical care < ANAESTHETICS, Cardiac surgery < SURGERY, Anticoagulation < HAEMATOLOGY, Bleeding disorders & coagulopathies < HAEMATOLOGY                                                                                                                                                                                                                                                                                                                                                                                                                                                                                                                                                                                                                                                                                                                                                                                                                                            |
|                               |                                                                                                                                                                                                                                                                                                                                                                                                                                                                                                                                                                                                                                                                                                                                                                                                                                                                                                                                                                                                        |

SCHOLARONE™  
Manuscripts

## Tranexamic Acid in Cardiac Surgery: a systematic review and meta-analysis (protocol)

Alaifan T<sup>1,2</sup>, Alenazy A<sup>1,2</sup>, Xiang Wang D<sup>3</sup>, Fernando S<sup>4,5</sup>, Spence J<sup>6,7</sup>, Belley-Cote E<sup>2,7,8,9</sup>, Fox-Robichaud A<sup>2</sup>, Ainsworth C<sup>2,8</sup>, Karachi T<sup>2</sup>, Kyeremanteng K<sup>4,11</sup>, Zarychanski R<sup>12</sup>, Whitlock R<sup>7,9,10</sup>, Rochweg B<sup>2,11</sup>.

1 first and second author contributed equally

2 Department of Medicine, Division of Critical Care, McMaster University

3 Schulich School of Medicine and Dentistry, University of Western Ontario

4 Division of Critical Care, Department of Medicine, University of Ottawa, Ottawa, ON

5 Department of Emergency Medicine, University of Ottawa, Ottawa, ON

6 Department of Anesthesia and Critical Care; McMaster University

7 Population Health Research Institute, McMaster University

8 Department of Medicine, Division of Cardiology, McMaster University

9 Department of Health Research Methods, Evidence & Impact, McMaster University, Hamilton, ON

10 Department of Surgery, Division of Cardiac Surgery, McMaster University

11 Clinical Epidemiology Program, Ottawa Hospital Research Institute, Ottawa, ON.

12 Department of Internal Medicine, Sections of Critical Care Medicine and of Hematology/Medical Oncology, University of Manitoba, Winnipeg, Canada

Email: [alaifan@gmail.com](mailto:alaifan@gmail.com), [Dr.alenazy@hotmail.com](mailto:Dr.alenazy@hotmail.com), [dwang2021@meds.uwo.ca](mailto:dwang2021@meds.uwo.ca), [sfernando@qmed.ca](mailto:sfernando@qmed.ca), [jessicaspence13@gmail.com](mailto:jessicaspence13@gmail.com), [Emilie.Belley-Cote@phri.ca](mailto:Emilie.Belley-Cote@phri.ca), [afoxrob@mcmaster.ca](mailto:afoxrob@mcmaster.ca), [ainswoc@mcmaster.ca](mailto:ainswoc@mcmaster.ca), [karachi@mcmaster.ca](mailto:karachi@mcmaster.ca), [kwadwo77@gmail.com](mailto:kwadwo77@gmail.com), [rzarychanski@cancercare.mb.ca](mailto:rzarychanski@cancercare.mb.ca), [Richard.Whitlock@phri.ca](mailto:Richard.Whitlock@phri.ca), [rochweg@mcmaster.ca](mailto:rochweg@mcmaster.ca)

### Corresponding Author and Reprint Requests:

Dr. Bram Rochweg

Department of Medicine, Division of Critical Care

Juravinski Hospital

711 Concession St, Hamilton ON

L8V 1C1

e-mail: [rochweg@mcmaster.ca](mailto:rochweg@mcmaster.ca)

1  
2  
3  
4  
5  
6  
7  
8  
9  
10  
11  
12  
13  
14  
15  
16  
17  
18  
19  
20  
21  
22  
23  
24  
25  
26  
27  
28  
29  
30  
31  
32  
33  
34  
35  
36  
37  
38  
39  
40  
41  
42  
43  
44  
45  
46  
47  
48  
49  
50  
51  
52  
53  
54  
55  
56  
57  
58  
59  
60

For peer review only

## Abstract

**Introduction:** Bleeding during cardiac surgery is associated with increased morbidity and mortality. Tranexamic acid is an antifibrinolytic with proven efficacy in major surgeries. Current clinical practice guidelines recommend intraoperative use in cardiac procedures. However, several complications have been reported with tranexamic acid including seizures. intended to summarize the evidence examining the efficacy and safety of tranexamic acid in patients undergoing cardiac surgery.

**Methods/design:** We will search MEDLINE, EMBASE, PubMed, ACPJC, CINAHL, and the Cochrane trial registry for eligible randomized controlled trials investigating the peri-operative use of topical and/or intravenous tranexamic acid as a stand-alone antifibrinolytic agent compared to placebo in patients undergoing open cardiac surgery. We categorized outcomes as patient critical or patient important. selected patient-critical outcomes are: mortality (ICU, hospital and 30-day endpoints), re-operation within 24 hours, post-operative bleeding requiring transfusion of packed red blood cells, myocardial infarction, stroke, pulmonary embolism, bowel infarction, upper or lower limb deep vein thrombosis, and seizures. Those outcomes, we perceived as clinical experts to be most patient valued and patients were not involved in outcomes selection process. We will not apply publication date, language, journal, or methodological quality restrictions. Two reviewers will independently screen and identify eligible studies using predefined eligibility criteria and then review full reports of all potentially relevant citations. A third reviewer will resolve disagreements if consensus cannot be achieved. We will present the results as relative risk (RR) with 95% confidence intervals for dichotomous outcomes and as mean difference (MD) or standardized mean difference (SMD) for continuous outcomes with 95% confidence intervals. We will assess the quality of evidence using the Grading of Recommendations, Assessment, Development and Evaluation (GRADE) approach.

**Ethics and dissemination:** The aim of this systematic review is to summarize the updated evidence on the efficacy and safety of tranexamic acid in cardiac surgery.

**Systematic review registration:** Protocol was registered with the International Prospective Register of Systematic Reviews (PROSPERO) on 26 October 2018 (registration number CRD42018105904).

**Funding statement:** The author(s) received no specific funding for this work

**Keywords:** Tranexamic acid, Cardiac surgery, Systematic review, Meta-analysis, Mortality,

1  
2  
3 Bleeding, Seizure.  
4  
5  
6  
7

## 8 **Article Summary:**

9 Our systematic review and meta-analysis are intended to summarize the evidence examining the efficacy  
10 and safety of tranexamic acid in patients undergoing cardiac surgery. We will examine the effect of the  
11 type of surgery, patient population and dosing strategies.  
12  
13

14 Strengths and Limitations of this protocol include:

- 15 • A comprehensive search strategy of published and unpublished literature
- 16 • Application of grade methodology to assess certainty of the estimates of effect
- 17 • Limitations relate to the anticipated heterogeneity of the included studies including dosing  
18 strategy, timing, type of surgery and preoperative antiplatelets therapy.  
19  
20  
21  
22  
23  
24  
25  
26  
27  
28  
29  
30

## 31 **Background**

### 32 **Description of the condition**

33  
34  
35  
36 15 million units of red blood cells transfused in surgical patients in the united states annually, Cardiac  
37 surgical procedures utilize as much as 10% to 15% [1]. Peri-operative bleeding is a common complication  
38 and is associated with the need for transfusion and re-operation [2,3]. These factors impact negatively on  
39 postoperative morbidity, mortality, and costs [4]. Coagulopathy, a contributor to excessive bleeding, is  
40 linked to the use of cardiopulmonary bypass, which leads to the activation of the intrinsic and extrinsic  
41 coagulation pathway, platelet dysfunction, and systemic inflammatory response [5,6,7]. As such,  
42 measures to prevent perioperative coagulopathy are recommended [8]. To this end, antifibrinolytic agents  
43 are used to prevent the breakdown of blood clots by plasmin.  
44  
45  
46  
47  
48  
49

50 Tranexamic acid is an antifibrinolytic agent that has be shown to reduce bleeding in major surgeries and  
51 trauma patients [9-10]. As a result, current clinical practice guidelines recommend its use in many  
52 perioperative settings, including cardiac surgery [11].  
53  
54  
55  
56  
57  
58  
59  
60

## Description of the Intervention

Tranexamic acid acts by reversibly blocking the lysine binding sites of plasminogen, thus preventing plasmin activation and, as a result, the lysis of polymerized fibrin [12]. Tranexamic acid is frequently utilized to enhance hemostasis, particularly when fibrinolysis contributes to hemorrhage. In clinical practice, tranexamic acid has been used to treat menorrhagia, trauma-associated hemorrhage, and to prevent perioperative bleeding associated with orthopedic and cardiac surgery [13-16]. Importantly, the use of tranexamic acid is not without adverse effects. Tranexamic acid has been associated with seizures [17,18], as well as increased thromboembolic events, graft thrombosis, stroke, and mesenteric ischemia [18-21]. These complications lead to increased mortality and morbidity, in addition to increased intensive care unit (ICU) and hospital lengths of stay (LOS) [22]. Moreover, both the route and quantity for administration of tranexamic acid has varied across cardiac surgery trials [23,24]. Tranexamic acid can be administered orally, topically, and intravenously. Topical and intravenous administration are most common in perioperative cardiac surgeries.

## How does the intervention work?

Fibrinolysis is the mechanism of clot breakdown and involves a cascade of interactions between zymogens and enzymes that act in concert with clot formation to maintain blood flow [25]. During extracorporeal circulation, such as cardiopulmonary bypass (CPB) used in cardiac surgery, multiplex changes in hemostasis arise that include accelerated thrombin generation, platelet dysfunction, and enhanced fibrinolysis [26]. Tranexamic acid inhibits fibrinolysis, a putative mechanism of bleeding after cardiopulmonary bypass, by forming a reversible complex with plasminogen [27].

## Why it is important to do this review

Currently, no definitive and up-to-date meta-analysis summarizes the efficacy and potential for harm of tranexamic acid in cardiac surgery. Two previous meta-analyses have been conducted, but they did not include recent large randomized controlled trials (RCTs). Furthermore, one of these reviews grouped tranexamic acid with aprotinin and aminocaproic acid [28] while the other only studied the effect in patients undergoing CABG without the use of cardiopulmonary bypass [29].

## Objectives

1  
2  
3 We plan to conduct a systematic review and meta-analysis of RCTs to investigate the use of tranexamic  
4 acid in adult patients underwent cardiac surgery.  
5  
6  
7

## 8 **Methods/design**

### 9 **Types of studies**

10  
11 We will only include RCTs which studied tranexamic acid in adults who underwent open cardiac surgery..  
12  
13 We will impose no language or methodological quality restrictions.  
14  
15  
16

### 17 **Types of participants**

18  
19 The population of interest is adult patients (18 years of age or older) who underwent open cardiac surgery  
20 including but not limited to CABG (on- or off-pump and midline sternotomy or thoracotomy), valve  
21 surgery, or ascending aorta and arch surgery including combined surgeries. We will exclude studies  
22 investigating transcatheter valvular procedures.  
23  
24  
25  
26  
27  
28

### 29 **Types of interventions and comparators**

30  
31 The intervention of interest is administration of tranexamic acid in the perioperative period (defined as  
32 between 24 hours pre-operatively and up to 24 hours post-operatively). We will include studies that  
33 examined the intravenous and topical mode of delivery of tranexamic acid and will include all dosing  
34 strategies. We will exclude studies that did not use tranexamic acid as a stand-alone agent (i.e. in  
35 combination with another antifibrinolytic). The comparator or control group must include only patients who  
36 did not receive antifibrinolytic agents (either usual care or placebo).  
37  
38  
39  
40  
41  
42  
43  
44

### 45 **Types of outcome measures**

46  
47 We will focus on outcomes we perceive as clinical experts to be most patient-important in order to assess  
48 the efficacy and safety of tranexamic acid. We categorized outcomes from a patient-perspective as either  
49 critical or important. The selected critical outcomes are: mortality (ICU, hospital and 30-day endpoints),  
50 re-operation within 24 hours, post-operative bleeding requiring transfusion of packed red blood cells,  
51 myocardial infarction, stroke, pulmonary embolism, bowel infarction, upper or lower limb deep vein  
52  
53  
54  
55  
56  
57  
58  
59  
60



1  
2  
3 thrombosis, and seizures. The important outcomes are: major bleeding (as defined by individual study  
4 authors), transfusion of other blood products (fresh frozen plasma and platelets), ICU length of stay, and  
5 hospital length of stay.  
6  
7  
8  
9

## 10 11 **Search methods for identification of studies**

12  
13 We will search the following electronic databases: MEDLINE, EMBASE, PubMed, ACPJC, CINAHL, and  
14 the Cochrane trial registry from inception for eligible articles with no language restriction. Keyword search  
15 terms include tranexamic acid, antifibrinolytic, coronary artery bypass grafting, cardiac surgery, cardiac  
16 valve surgery, ascending aorta and arch surgery, lysine analogue, bleeding, re-sternotomy and CABG.  
17  
18  
19  
20  
21  
22

## 23 **Searching other resources**

24  
25 Two reviewers will independently search for eligible articles. In addition, we will search for unpublished  
26 and ongoing trials on the WHO International Clinical Trials Registry (WHO ICTRP), metaRegister of  
27 Controlled Trials (mRCT), ClinicalTrials.gov, Conference Proceedings Citation Index-Science (CPCI-S)  
28 within the last 2 years. We will also search conference abstracts from the following societies published in  
29 the last two years: American Heart Association (AHA), American College of Cardiology (ACC), European  
30 Society of Cardiology (ESC), American Society of Thoracic Surgeons (AATS), Canadian Cardiovascular  
31 Society (CCS), European Association for Cardio-Thoracic Surgery (EACTS), American Society of  
32 Anesthesiology (ASA), Society of Critical Care Medicine (SCCM), Canadian Critical Care Society  
33 (CCCS), and European Society of Intensive Care Medicine (ESICM).  
34  
35  
36  
37  
38  
39  
40  
41  
42

## 43 **Data collection and analysis**

44  
45 After identifying potentially relevant articles through the search process described above, reviewers  
46 working in pairs will independently screen all citations and references using specific pre-defined eligibility  
47 criteria. We will screen in two stages: first reviewing titles and abstracts, and second reviewing the full-  
48 text. Disagreements in screening will be resolved by discussion and consensus with the help of a third  
49 reviewer if needed.  
50  
51  
52  
53  
54  
55  
56  
57  
58  
59  
60

## Data Extraction and Management

Data extraction will be done independently and in duplicate using pre-designed data abstraction forms. Abstracted data will include the study title, first author, relevant demographic data, intervention and control, results for outcomes of interest, and information on the methodological quality for each study. A third reviewer will resolve discrepancies in data extraction between reviewers.

## Assessment of risk of bias in included studies

Two reviewers will independently assess the risk of bias of included studies using the Cochrane Collaboration tool for assessing risk of bias in RCTs [30]. We will assess risk of bias individually for each outcome. A third reviewer will be available to resolve any disagreements. For each study, we will include a description for all domains assessed, along with comments if necessary and a final judgment. The risk of bias of a trial will be categorized as follows: (1) low risk of bias, where bias is not present or if present, unlikely to affect outcomes, (2) high risk of bias, where outcomes are likely to be significantly affected by bias, (3) unclear risk of bias, where the reported information is inadequate to properly assess bias.

Included trials will be assessed for adequate sequence generation, allocation sequence concealment, blinding, selective outcome reporting, and other bias. Sequence generation will be considered adequate if the study explicitly described an appropriate randomization procedure to generate an unpredictable sequence of allocation, including computerized randomization, use of random number tables, and coin tossing. Concealment of allocation will be considered adequate if specific methods to protect allocation were documented and implemented. Performance bias will be considered low if a study reported participant, caregiver, and/or researcher blinding. Blinding of outcome assessment will be considered adequate if outcome assessors and adjudicators were blinded. Within-study selective reporting of outcomes will be examined by reviewing the a priori study protocol, if available. If the study protocol is not available, we will compare the outcomes listed in the "Methods/design" section with those reported in the manuscript.

## Measures of treatment effect

When pooling of outcome data is appropriate, RevMan 5.3 software will be used to conduct meta-analyses. We will use the method of DerSimonian and Laird to pool effect sizes for each outcome under a

1  
2  
3 random effects model; study weights will be measured using the inverse variance method. We will  
4 present the results as relative risk (RR) with 95% confidence intervals (CIs) for dichotomous outcomes  
5 and as mean difference (MD) or standardized mean difference (SMD) with 95% CIs for continuous  
6 outcomes.  
7  
8  
9

10  
11 We plan to perform random effects analysis for all outcomes of interest. If significant unexplained  
12 heterogeneity exists, or if there is an insufficient number of RCTs for meta-analysis, we will describe data  
13 qualitatively. The number needed to treat (NNT) with 95% CIs will be derived from pooled risk ratios and  
14 its 95% CIs utilizing assumed control risk (ACR) for each outcome similar to the approach recommended  
15 by the Cochrane collaboration;  $NNT = 1/[ACR \times (1 - RR)]$  [31].  
16  
17  
18  
19  
20  
21  
22

### 23 **Dealing with missing data**

24  
25 If we encounter missing data, we will attempt contact the study authors for additional information. If we  
26 can not obtain additional data, we will analyze the available data and report the potential impact of  
27 missing data in the discussion.  
28  
29  
30

### 31 **Assessment of heterogeneity**

32 We will assess for heterogeneity between studies using the chi-squared test for homogeneity, where  $p <$   
33  $0.10$  indicates substantial heterogeneity, and the  $I^2$  statistic. We consider  $I^2 > 50\%$  to be significant  
34 heterogeneity, which will be further investigated with subgroup analyses to assess clinical and  
35 methodological sources of heterogeneity in intervention effect.  
36  
37  
38  
39  
40  
41  
42

### 43 **Assessment of reporting biases**

44  
45 We will look for potential publication bias using a funnel plot if more than ten trials are included for an  
46 outcome. For continuous outcomes, the Egger test [30] will be used to detect funnel plot asymmetry. For  
47 dichotomous outcomes, we will use the arcsine test. All analyses will be performed using RevMan or  
48 Stata.  
49  
50  
51  
52

### 53 **Subgroup analysis and investigation of heterogeneity**

Potential and expected clinical sources of heterogeneity include different patient demographics, dosing strategies, route of administration, and type of cardiac surgery. To explore significant heterogeneity, if a sufficient number of trials are available, we will conduct the following pre-specified subgroup analyses (hypothesized direction of effect in parentheses):

- Off- versus on-pump cardiac surgery (tranexamic acid is more effective in on-pump surgery)
- Type of surgery (tranexamic acid is more effective in valvular heart surgery or aortic arch/ascending aorta surgery as compared to CABG)
- Combined procedures versus single procedure (tranexamic acid is more effective in combined procedures)
- Urgent versus elective surgery (tranexamic acid is more effective in urgent surgeries)
- Single dose versus multiple doses and/or continuous infusion (multiple doses or continuous infusion is more effective)
- Patients who received aspirin within 4 days of their procedure vs. no antiplatelets agents (tranexamic acid is more effective in those receiving antiplatelets)
- Patients receiving dual antiplatelets within 4 days of procedure (tranexamic acid is more effective in those receiving dual antiplatelets)
- High versus low risk for bias studies (tranexamic acid is more effective in high risk of bias studies).

We will use the Chi-squared test for each subgroup hypothesis ( $p < 0.10$  for significance). We will conduct meta-regression to assess the effect of tranexamic dose as a continuous independent variable on the outcomes using Stata hypothesizing that higher dose is more effective. If subgroups effects are credible, we will present the outcomes separately for each subgroup.

## Sensitivity analysis

A priori sensitivity analysis will be performed, excluding studies only reported as abstracts. Post hoc sensitivity analysis will be performed if required.

## Assessing the quality of evidence

The Grading of Recommendations Assessment, Development and Evaluation (GRADE) approach will be used to assess the quality of evidence for each outcome [32]. The GRADE system classifies the quality of the aggregate body of evidence as high, moderate, low, or very low. The evidence will be evaluated using the following criteria: (1) study design and rigor of its execution (i.e. individual study risk of bias), (2) the

1  
2  
3 extent to which the evidence could be applied to patients of interest (i.e. directness), (3) the consistency  
4 of results, (4) the analysis of the results (i.e. precision), and (5) the likelihood of publication bias. The  
5 following three factors will increase the quality of evidence if present: (1) a strong or very strong  
6 association between an intervention and the observation of interest, (2) a highly statistically significant  
7 relationship between dose and effect, and (3) a plausible confounding variable that could explain a  
8 reduced effect or could explain an effect if one was not anticipated. We will summarize the overall quality  
9 of evidence for the intervention taking into consideration both desirable and adverse outcomes. We will  
10 include an evidence profile in the results showing the GRADE assessments and pooled analysis per  
11 outcome.  
12  
13  
14  
15  
16  
17  
18  
19

### 20 **Patient and Public Involvement:**

21 We categorized outcomes as we perceived it as clinical experts to be more patient valued into patient  
22 critical and patient important outcomes. but there were no patients involved in the process of selection.  
23  
24  
25  
26  
27  
28

## 29 **DISCUSSION**

30 Bleeding is one of the major complications of cardiac surgeries [5]. The inhibition of fibrinolysis inhibition  
31 using lysine analogues is a common approach used to reduce the intra and post-operative bleeding  
32 associated with cardiac surgery [33]. Tranexamic acid is the most common lysine analogue used in  
33 clinical use. Despite its benefits in the prevention of bleeding that has been repeatedly reported  
34 tranexamic acid has not been shown to reduce mortality. Tranexamic acid has existing safety concerns,  
35 including elevated risks of myocardial infarction, stroke, veno-thromboembolic disease and seizures [17-  
36 21]. Despite trial level data, the balance between bleeding prevention and the hypothetical side effects of  
37 tranexamic acid remains uncertain.  
38  
39  
40  
41  
42  
43

44 Our systematic review and meta-analysis are intended to summarize the evidence examining the efficacy  
45 and safety of tranexamic acid in patients undergoing cardiac surgery. We will examine the effect of the  
46 type of surgery, patient population and dosing strategies. Strengths of this protocol include a  
47 comprehensive search strategy of published and unpublished literature and application of GRADE  
48 methodology to assess certainty of the estimates of effect. Limitations relate to the anticipated  
49 heterogeneity of the included studies.  
50  
51  
52  
53  
54

55 **Funding statement:** The author(s) received no specific funding for this work  
56  
57  
58  
59  
60

1  
2  
3  
4 **Conflict of interest:** Authors have no conflict of interest to declare.

5 **Acknowledgements** We would like to express our gratitude to Sandy Culley  
6 for guidance in designing and carrying out our search strategy.  
7

8  
9 **Contributors** TA, AA, BR,CA,EB conceived the idea for this systematic review.  
10 All authors developed the methodology for the systematic review. The manuscript  
11 was drafted by TA,AA,DX and BR and revised by all authors. TA,AA and DX will screen potential  
12 studies perform duplicate independent data abstraction, risk of bias assessment  
13 and GRADE assessment with help from other authors. BR  
14 will conduct the data synthesis. BR is the guarantor of the review.  
15  
16  
17  
18  
19  
20  
21  
22  
23  
24  
25  
26  
27  
28  
29  
30  
31  
32  
33  
34  
35  
36  
37  
38  
39  
40  
41  
42  
43  
44  
45  
46  
47  
48  
49  
50  
51  
52  
53  
54  
55  
56  
57  
58  
59  
60

## References:

1. Sullivan, M. T., Cotten, R., Read, E. J., & Wallace, E. L. (2007). Blood collection and transfusion in the United States in 2001. *Transfusion*, 47(3), 385-394.
2. Colson PH, Gaudard P, Fellahi J-L, Bertet H, Faucanie M, Amour J, et al. Active Bleeding after Cardiac Surgery: A Prospective Observational Multicenter Study. *PLoS ONE*. 2016 Sep 2;11(9):e0162396.
3. Kristensen KL, Rauer LJ, Mortensen PE, Kjeldsen BJ. Reoperation for bleeding in cardiac surgery. *Interactive Cardiovascular and Thoracic Surgery*. 2012 Jun;14(6):709-713.
4. Vivacqua A, Koch CG, Yousuf AM, Nowicki ER, Houghtaling PL, Blackstone EH, Sabik JF 3rd. Morbidity of bleeding after cardiac surgery: is it blood transfusion, reoperation for bleeding, or both? *Ann Thorac Surg*. 2011 Jun;91(6): 1780-90.
5. Paparella D et al. Activation of the coagulation system during coronary artery bypass grafting: comparison between on-pump and off-pump techniques. *J Thorac Cardiovasc Surg*. 2006 Feb;131(2):290-7.
6. Ickx BE, Faraoni D. Management of the clotting system: a European perspective. *Curr Opin Anaesthesiol*. 2012 Feb;25(1): 80-85.
7. Hess PJ Jr. Systemic inflammatory response to coronary artery bypass graft surgery. *Am J Health Syst Pharm*. 2005 Sep 15;62:S6-S9.
8. Pagano D, Milojevic M, Meesters MI, Benedetto U, Bolliger D, Von Heymann C, Jeppsson A, Koster A, Osnabrugge RL, Ranucci M, Ravn HB, Vonk ABA, Wahba A, Boer C. 2017 EACTS/EACTA Guidelines on patient blood management for adult cardiac surgery. *Eur J Cardiothorac Surg* 2018 Jan 1;53(1):79-111.
9. Ker, K., Edwards, P., Perel, P., Shakur, H., & Roberts, I. (2012). Effect of tranexamic acid on surgical bleeding: systematic review and cumulative meta-analysis. *Bmj*, 344, e3054.
10. CRASH-2 trial collaborators. Effects of tranexamic acid on death, vascular occlusive events, and blood transfusion in trauma patients with significant haemorrhage (CRASH-2). *The Lancet*. 2010 Jul;376(9734):23-32.
11. Ferraris et al .2011 Update to The Society of Thoracic Surgeons and the Society of Cardiovascular Anesthesiologists Blood Conservation Clinical Practice Guidelines. *Ann Thorac Surg* 2011Mar;91(3):944-82.
12. Dunn CJ, Goa KL. Tranexamic acid: a review of its use in surgery and other indications. *Drugs*. 1999 Jun;57(6):1005-32.
13. Lukes AS et al. Tranexamic acid for heavy menstrual bleeding. *Obstetrics & Gynecology*. 2010 Oct;116(4):865-75.
14. Sukeik M, Alshryda S, Haddad FS, Mason JM. Systematic review and meta-analysis of the use of tranexamic acid in total hip replacement. *J Bone Joint Surg Br*. 2011 Jan;93(1):39-46.
15. Morrison JJ, Dubose JJ, Rasmussen TE, Midwinter MJ. Military Application of Tranexamic Acid in Trauma Emergency Resuscitation (MATTERs) Study. *Arch Surg*. 2012 Feb;147(2):113-119.
16. Brown JR, Birkmeyer NJ, O'Connor GT. Meta-analysis comparing the effectiveness and adverse outcomes of antifibrinolytic agents in cardiac surgery. *Circulation*. 2007 Jun;115(22):2801-13.
17. Sharma V, Katznelson R, Jerath A, Garrido-Olivares L, Carroll J, Rao V, Wasowicz M, Djaiani G. The association between tranexamic acid and convulsive seizures after cardiac surgery: a multivariate analysis in 11 529 patients. *Anaesthesia* 2014 Feb;69(2):124-30.

18. Koster A, Börgermann J, Zittermann A, Lueth JU, Gillis-Januszewski T, Schirmer U. Moderate dosage of tranexamic acid during cardiac surgery with cardiopulmonary bypass and convulsive seizures: incidence and clinical outcome. *Br J Anaesth*. 2013 Jan;110(1):34–40.
19. ATACAS Investigators. Tranexamic acid in patients undergoing coronary-artery surgery. *N Engl J Med* 2017 Jan;376(2):136–48.
20. Hutton B, Joseph L, Fergusson D, Mazer CD, Shapiro S, Tinmouth A. Risks of harms using antifibrinolytics in cardiac surgery: systematic review and network meta-analysis of randomised and observational studies. *The BMJ*. 2012 Sep;345:e5798.
21. Michael A. Borger, Joan Ivanov, Richard D. Weisel, Vivek Rao, Charles M. Peniston; Stroke during coronary bypass surgery: principal role of cerebral macroemboli. *European Journal of Cardio-Thoracic Surgery*. 2001 May;19(5):627–632.
22. Sander M et al. Mortality associated with administration of high-dose tranexamic acid and aprotinin in primary open-heart procedures: a retrospective analysis. *Critical Care* 2010;14(4):R148.
23. Sigaut S, Tremey B, Ouattara A, Couturier R, Taberlet C, Grassin-Delyle S, Dreyfus JF, Schlumberger S, Fischler M. Comparison of two doses of tranexamic acid in adults undergoing cardiac surgery with cardiopulmonary bypass. *Anesthesiology* 2014 Mar;120(3):590–600.
24. Waldow T, Szlapka M, Haferkorn M, Bürger L, Plötze K, Matschke K. Prospective clinical trial on dosage optimizing of tranexamic acid in non-emergency cardiac surgery procedures. *Clin Hemorheol Microcirc* 2013 Jan;55(4):457–68.
25. McCormack, P.L. Tranexamic Acid: A review of its Use in the Treatment of Hyperfibrinolysis. *Drugs*. 2012 Mar;72(5):585–617
26. Amy L. Cilia La Corte, Helen Philippou, Robert A.S. Ariëns. Role of Fibrin Structure in Thrombosis and Vascular Disease. *Advances in Protein Chemistry and Structural Biology*. 2011;83: 75–127.
27. Sniecinski RM, Chandler WL. Activation of the hemostatic system during cardiopulmonary bypass. *Anesth Analg*. 2011 Dec;113(6):1319–33.
28. Mcllroy DR, Myles PS, Phillips LE, Smith JA. Antifibrinolytics in cardiac surgical patients receiving aspirin: a systematic review and meta-analysis. *Br J Anaesth*. 2009 Feb;102(2):168–78.
29. Dai Z, Chu H, Wang S, Liang Y. The effect of tranexamic acid to reduce blood loss and transfusion on off-pump coronary artery bypass surgery: A systematic review and cumulative meta-analysis. *J Clin Anesth*. 2018 Feb;44:23–31.
30. Higgins JP, Altman DG, Gøtzsche PC, Jüni P, Moher D, Oxman AD, et al. The Cochrane Collaboration's tool for assessing risk of bias in randomised trials. *BMJ*. 2011;343:d5928.
31. Higgins JPT, Green S, eds. *Cochrane Handbook for Systematic Reviews of Interventions* Version 5.1.0 [updated March 2011]. The Cochrane Collaboration, 2011. Available from [www.cochrane-handbook.org](http://www.cochrane-handbook.org).
32. Guyatt GH, Oxman AD, Vist GE, Kunz R, Falck-Ytter Y, Alonso-Coello P, et al. GRADE: an emerging consensus on rating quality of evidence and strength of recommendations. *BMJ*. 2008;336 (7650):924–6.
33. Katsaros D et al. Tranexamic acid reduces postbypass blood use.. *Ann Thorac Surg*. 1996 Apr;61(4):1131–5.



1  
2  
3  
4  
5  
6  
7  
8  
9  
10  
11  
12  
13  
14  
15  
16  
17  
18  
19  
20  
21  
22  
23  
24  
25  
26  
27  
28  
29  
30  
31  
32  
33  
34  
35  
36  
37  
38  
39  
40  
41  
42  
43  
44  
45  
46  
47  
48  
49  
50  
51  
52  
53  
54  
55  
56  
57  
58  
59  
60

For peer review only

# BMJ Open

## Tranexamic Acid in Cardiac Surgery: a systematic review and meta-analysis (protocol)

|                                 |                                                                                                                                                                                                                                                                                                                                                                                                                                                                                                                                                                                                                                                                                                                                                                                                                                                                                                                                                                                                        |
|---------------------------------|--------------------------------------------------------------------------------------------------------------------------------------------------------------------------------------------------------------------------------------------------------------------------------------------------------------------------------------------------------------------------------------------------------------------------------------------------------------------------------------------------------------------------------------------------------------------------------------------------------------------------------------------------------------------------------------------------------------------------------------------------------------------------------------------------------------------------------------------------------------------------------------------------------------------------------------------------------------------------------------------------------|
| Journal:                        | <i>BMJ Open</i>                                                                                                                                                                                                                                                                                                                                                                                                                                                                                                                                                                                                                                                                                                                                                                                                                                                                                                                                                                                        |
| Manuscript ID                   | bmjopen-2018-028585.R1                                                                                                                                                                                                                                                                                                                                                                                                                                                                                                                                                                                                                                                                                                                                                                                                                                                                                                                                                                                 |
| Article Type:                   | Protocol                                                                                                                                                                                                                                                                                                                                                                                                                                                                                                                                                                                                                                                                                                                                                                                                                                                                                                                                                                                               |
| Date Submitted by the Author:   | 30-Jul-2019                                                                                                                                                                                                                                                                                                                                                                                                                                                                                                                                                                                                                                                                                                                                                                                                                                                                                                                                                                                            |
| Complete List of Authors:       | Alaifan, Thamer; McMaster University Department of Medicine, Alenazy, Ahmed; McMaster University Department of Medicine, critical care<br>Xiang Wang , Dominic; Western University Department of Medicine<br>Fernando, Shannon; University of Ottawa, Department of Emergency Medicine<br>Spence, Jessica; McMaster University, Departments of Anesthesia and Clinical Epidemiology and Biostatistics<br>Belley-Cote, Emilie; McMaster University; Universite de Sherbrooke, Medicine<br>Fox-Robichaud, Alison; McMaster University, Medicine<br>Ainswoth, Craig; McMaster University Department of Medicine, Critical care , cardiology<br>Karachi, Tim; McMaster University, Medicine<br>Kyeremanteng , Kwadwo ; University of Ottawa Faculty of Medicine, critical care<br>Zarychanski, Ryan ; University of Manitoba, Sections of Critical Care and Hematology/Medical Oncology<br>Whitlock, Richard; McMaster University, Surgery<br>Rochweg, Bram; McMaster University, Medicine (Critical Care) |
| <b>Primary Subject Heading</b>: | Cardiovascular medicine                                                                                                                                                                                                                                                                                                                                                                                                                                                                                                                                                                                                                                                                                                                                                                                                                                                                                                                                                                                |
| Secondary Subject Heading:      | Anaesthesia, Cardiovascular medicine, Haematology (incl blood transfusion), Intensive care, Pharmacology and therapeutics                                                                                                                                                                                                                                                                                                                                                                                                                                                                                                                                                                                                                                                                                                                                                                                                                                                                              |
| Keywords:                       | Adult intensive & critical care < ANAESTHETICS, Cardiac surgery < SURGERY, Anticoagulation < HAEMATOLOGY, Bleeding disorders & coagulopathies < HAEMATOLOGY                                                                                                                                                                                                                                                                                                                                                                                                                                                                                                                                                                                                                                                                                                                                                                                                                                            |
|                                 |                                                                                                                                                                                                                                                                                                                                                                                                                                                                                                                                                                                                                                                                                                                                                                                                                                                                                                                                                                                                        |

SCHOLARONE™  
Manuscripts

## Tranexamic Acid in Cardiac Surgery: a systematic review and meta-analysis (protocol)

Alaifan T<sup>1,2</sup>, Alenazy A<sup>1,2</sup>, Xiang Wang D<sup>3</sup>, Fernando S<sup>4,5</sup>, Spence J<sup>6,7</sup>, Belley-Cote E<sup>2,7,8,9</sup>, Fox-Robichaud A<sup>2</sup>, Ainsworth C<sup>2,8</sup>, Karachi T<sup>2</sup>, Kyeremanteng K<sup>4,11</sup>, Zarychanski R<sup>12</sup>, Whitlock R<sup>7,9,10</sup>, Rochweg B<sup>2,11</sup>.

1 first and second author contributed equally

2 Department of Medicine, Division of Critical Care, McMaster University

3 Schulich School of Medicine and Dentistry, University of Western Ontario

4 Division of Critical Care, Department of Medicine, University of Ottawa, Ottawa, ON

5 Department of Emergency Medicine, University of Ottawa, Ottawa, ON

6 Department of Anesthesia and Critical Care; McMaster University

7 Population Health Research Institute, McMaster University

8 Department of Medicine, Division of Cardiology, McMaster University

9 Department of Health Research Methods, Evidence & Impact, McMaster University, Hamilton, ON

10 Department of Surgery, Division of Cardiac Surgery, McMaster University

11 Clinical Epidemiology Program, Ottawa Hospital Research Institute, Ottawa, ON.

12 Department of Internal Medicine, Sections of Critical Care Medicine and of Hematology/Medical Oncology, University of Manitoba, Winnipeg, Canada

Email: [alaifan@gmail.com](mailto:alaifan@gmail.com), [Dr.alenazy@hotmail.com](mailto:Dr.alenazy@hotmail.com), [dwang2021@meds.uwo.ca](mailto:dwang2021@meds.uwo.ca), [sfernando@qmed.ca](mailto:sfernando@qmed.ca), [jessicaspence13@gmail.com](mailto:jessicaspence13@gmail.com), [Emilie.Belley-Cote@phri.ca](mailto:Emilie.Belley-Cote@phri.ca), [afoxrob@mcmaster.ca](mailto:afoxrob@mcmaster.ca), [ainswoc@mcmaster.ca](mailto:ainswoc@mcmaster.ca), [karachi@mcmaster.ca](mailto:karachi@mcmaster.ca), [kwadwo77@gmail.com](mailto:kwadwo77@gmail.com), [rzarychanski@cancercare.mb.ca](mailto:rzarychanski@cancercare.mb.ca), [Richard.Whitlock@phri.ca](mailto:Richard.Whitlock@phri.ca), [rochweg@mcmaster.ca](mailto:rochweg@mcmaster.ca)

### Corresponding Author and Reprint Requests:

Dr. Bram Rochweg  
Department of Medicine, Division of Critical Care  
Juravinski Hospital  
711 Concession St, Hamilton ON  
L8V 1C1  
e-mail: [rochweg@mcmaster.ca](mailto:rochweg@mcmaster.ca)

1  
2  
3  
4  
5  
6  
7  
8  
9  
10  
11  
12  
13  
14  
15  
16  
17  
18  
19  
20  
21  
22  
23  
24  
25  
26  
27  
28  
29  
30  
31  
32  
33  
34  
35  
36  
37  
38  
39  
40  
41  
42  
43  
44  
45  
46  
47  
48  
49  
50  
51  
52  
53  
54  
55  
56  
57  
58  
59  
60

For peer review only

## Abstract

**Introduction:** Bleeding during cardiac surgery is associated with increased morbidity and mortality. Tranexamic acid is an antifibrinolytic with proven efficacy in major surgeries. Current clinical practice guidelines recommend intraoperative use in cardiac procedures. However, several complications have been reported with tranexamic acid including seizures. This review intends to summarize the evidence examining the efficacy and safety of tranexamic acid in patients undergoing cardiac surgery.

**Methods/design:** We will search MEDLINE, EMBASE, PubMed, ACPJC, CINAHL, and the Cochrane trial registry for eligible randomized controlled trials, the search dates for all databases will be from inception until January 1st 2019, investigating the peri-operative use of topical and/or intravenous tranexamic acid as a stand-alone antifibrinolytic agent compared to placebo in patients undergoing open cardiac surgery. We categorized outcomes as patient critical or patient important. Selected patient-critical outcomes are: mortality (ICU, hospital and 30-day endpoints), re-operation within 24 hours, post-operative bleeding requiring transfusion of packed red blood cells, myocardial infarction, stroke, pulmonary embolism, bowel infarction, upper or lower limb deep vein thrombosis, and seizures. Those outcomes, we perceived as clinical experts to be most patient valued and patients were not involved in outcomes selection process.

We will not apply publication date, language, journal, or methodological quality restrictions. Two reviewers will independently screen and identify eligible studies using predefined eligibility criteria and then review full reports of all potentially relevant citations. A third reviewer will resolve disagreements if consensus cannot be achieved.

We will present the results as relative risk (RR) with 95% confidence intervals for dichotomous outcomes and as mean difference (MD) or standardized mean difference (SMD) for continuous outcomes with 95% confidence intervals. We will assess the quality of evidence using the Grading of Recommendations, Assessment, Development and Evaluation (GRADE) approach.

**Ethics and dissemination:** Formal ethical approval is not required as primary data will not be collected. The results will be disseminated through a peer-reviewed publication

**Systematic review registration:** Protocol was registered with the International Prospective Register of Systematic Reviews (PROSPERO) on 26 October 2018 (registration number CRD42018105904).

**Funding statement:** The author(s) received no specific funding for this work

**Keywords:** Tranexamic acid, Cardiac surgery, Systematic review, Meta-analysis, Mortality,

1  
2  
3 Bleeding, Seizure.  
4  
5  
6  
7

## 8 **Article Summary:**

9 Strengths and Limitations of this protocol include:

- 11 • A comprehensive search strategy of published and unpublished literature
- 12 • Application of grade methodology to assess certainty of the estimates of effect
- 13 • Limitations relate to the anticipated heterogeneity of the included studies including dosing
- 14 strategy, timing, type of surgery and preoperative antiplatelets therapy.
- 15
- 16
- 17
- 18
- 19
- 20
- 21
- 22
- 23
- 24
- 25
- 26

## 27 **Background**

### 28 **Description of the condition**

29  
30  
31  
32 Surgical patients in the United States receive 15 million units of red blood cell transfusions annually,  
33 cardiac surgical procedures utilize as much as 10% to 15% of this [1]. Peri-operative bleeding is a  
34 common complication and is associated with the need for transfusion and re-operation [2,3]. These  
35 factors impact negatively on postoperative morbidity, mortality, and costs [4]. Coagulopathy, a contributor  
36 to excessive bleeding, is linked to the use of cardiopulmonary bypass, which leads to the activation of the  
37 intrinsic and extrinsic coagulation pathway, platelet dysfunction, and systemic inflammatory response  
38 [5,6,7]. As such, measures to prevent perioperative coagulopathy are recommended [8]. To this end,  
39 antifibrinolytic agents are used to prevent the breakdown of blood clots by plasmin.  
40  
41  
42  
43  
44  
45

46 Tranexamic acid is an antifibrinolytic agent that has been shown to reduce bleeding in major surgeries and  
47 trauma patients [9-10]. As a result, current clinical practice guidelines recommend its use in many  
48 perioperative settings, including cardiac surgery [11].  
49  
50

### 51 **Description of the Intervention**

52  
53  
54 Tranexamic acid acts by reversibly blocking the lysine binding sites of plasminogen, thus preventing  
55 plasmin activation and, as a result, the lysis of polymerized fibrin [12]. Tranexamic acid is frequently  
56  
57  
58  
59  
60

1  
2  
3 utilized to enhance hemostasis, particularly when fibrinolysis contributes to bleeding. In clinical practice,  
4 tranexamic acid has been used to treat menorrhagia, trauma-associated bleeding, and to prevent  
5 perioperative bleeding associated with orthopedic and cardiac surgery [13-16]. Importantly, the use of  
6 tranexamic acid is not without adverse effects. Tranexamic acid has been associated with seizures  
7 [17,18], as well as concerns of possible increased thromboembolic events, including stroke which to-date  
8 have not been demonstrated in randomized controlled trials [19-20]. Stroke after cardiac surgery might  
9 lead to increased mortality and morbidity, in addition to increased intensive care unit (ICU) and hospital  
10 lengths of stay (LOS) [21-22]. Moreover, both the route and quantity for administration of tranexamic acid  
11 has varied across cardiac surgery trials [23,24]. Tranexamic acid can be administered orally, topically,  
12 and intravenously. Topical and intravenous administration are most common in perioperative cardiac  
13 surgeries.  
14  
15  
16  
17  
18  
19  
20  
21  
22  
23

### 24 **How does the intervention work?**

25  
26 Fibrinolysis is the mechanism of clot breakdown and involves a cascade of interactions between  
27 zymogens and enzymes that act in concert with clot formation to maintain blood flow [25]. During  
28 extracorporeal circulation, such as cardiopulmonary bypass (CPB) used in cardiac surgery, multiplex  
29 changes in hemostasis arise that include accelerated thrombin generation, platelet dysfunction, and  
30 enhanced fibrinolysis [26]. Tranexamic acid inhibits fibrinolysis, a putative mechanism of bleeding after  
31 cardiopulmonary bypass, by forming a reversible complex with plasminogen [27].  
32  
33  
34  
35  
36  
37  
38  
39  
40

### 41 **Why it is important to do this review**

42 Currently, no definitive and up-to-date meta-analysis summarizes the efficacy and potential for harm of  
43 tranexamic acid in cardiac surgery. Several meta-analyses have been conducted, but they did not include  
44 recent large randomized controlled trials (RCTs) [20] or comprehensively looked at both efficacy and  
45 harm. Furthermore, one of these reviews grouped tranexamic acid with aprotinin and aminocaproic acid  
46 [28] while the most recent meta-analysis studied the effect in patients undergoing CABG without the use  
47 of cardiopulmonary bypass [29].  
48  
49  
50  
51

### 52 **Objectives**

1  
2  
3 We plan to conduct a systematic review and meta-analysis of RCTs to investigate the use of tranexamic  
4 acid in adult patients underwent cardiac surgery.  
5  
6  
7

## 8 **Methods/design**

### 9 **Types of studies**

10  
11 We will only include RCTs which studied tranexamic acid in adults who underwent open cardiac surgery..  
12  
13 We will impose no language or methodological quality restrictions.  
14  
15  
16

### 17 **Types of participants**

18  
19 The population of interest is adult patients (18 years of age or older) who underwent open cardiac surgery  
20 including but not limited to CABG (on- or off-pump and midline sternotomy or thoracotomy), valve  
21 surgery, or ascending aorta and arch surgery including combined surgeries. We will exclude studies  
22 investigating transcatheter valvular procedures.  
23  
24  
25  
26  
27  
28

### 29 **Types of interventions and comparators**

30  
31 The intervention of interest is administration of tranexamic acid in the perioperative period (defined as  
32 between 24 hours pre-operatively and up to 24 hours post-operatively). We will include studies that  
33 examined the intravenous and topical mode of delivery of tranexamic acid and will include all dosing  
34 strategies. We will exclude studies that did not use tranexamic acid as a stand-alone agent (i.e. in  
35 combination with another antifibrinolytic). The comparator or control group must include only patients who  
36 did not receive antifibrinolytic agents (either usual care or placebo).  
37  
38  
39  
40  
41  
42  
43  
44  
45

### 46 **Types of outcome measures**

47  
48 We will focus on outcomes we perceive as clinical experts to be most patient-important in order to assess  
49 the efficacy and safety of tranexamic acid. We categorized outcomes from a patient-perspective as either  
50 critical or important. The selected critical outcomes are: mortality (ICU, hospital and 30-day endpoints),  
51 re-operation within 24 hours, post-operative bleeding requiring transfusion of packed red blood cells,  
52 myocardial infarction, stroke, pulmonary embolism, bowel infarction, upper or lower limb deep vein  
53  
54  
55  
56  
57  
58  
59  
60



1  
2  
3 thrombosis, and seizures. The important outcomes are: bleeding (defined as chest tube output in milliliter  
4 within 24 hours post-operatively), transfusion of other blood products (fresh frozen plasma and platelets),  
5 ICU length of stay, and hospital length of stay. The time frame for all outcomes is during ICU stay unless  
6 otherwise mentioned.  
7  
8  
9

## 10 11 12 **Search methods for identification of studies**

13  
14  
15 We will search the following electronic databases: MEDLINE, EMBASE, PubMed, ACPJC, CINAHL, and  
16 the Cochrane trial registry from inception for eligible articles with no language restriction. Keyword search  
17 terms include tranexamic acid, antifibrinolytic, coronary artery bypass grafting, cardiac surgery, cardiac  
18 valve surgery, ascending aorta and arch surgery, lysine analogue, bleeding, re-sternotomy and CABG;  
19 detailed search strategy (supplementary file). search dates for all databases will be from inception until  
20 January 1st, 2019. Although we plan to update the search just prior to submission to ensure it is as up to  
21 date as possible  
22  
23  
24  
25  
26  
27  
28  
29

## 30 31 **Searching other resources**

32 Two reviewers will independently search for eligible articles. In addition, we will search for unpublished  
33 and ongoing trials on the WHO International Clinical Trials Registry (WHO ICTRP), metaRegister of  
34 Controlled Trials (mRCT), ClinicalTrials.gov, Conference Proceedings Citation Index-Science (CPCI-S).  
35 We will also search conference abstracts from the following societies published in the last two years:  
36 American Heart Association (AHA), American College of Cardiology (ACC), European Society of  
37 Cardiology (ESC), American Society of Thoracic Surgeons (AATS), Canadian Cardiovascular Society  
38 (CCS), European Association for Cardio-Thoracic Surgery (EACTS), American Society of Anesthesiology  
39 (ASA), Society of Critical Care Medicine (SCCM), Canadian Critical Care Society (CCCS), and European  
40 Society of Intensive Care Medicine (ESICM).  
41  
42  
43  
44  
45  
46  
47  
48  
49

## 50 51 **Data collection and analysis**

52 After identifying potentially relevant articles through the search process described above, reviewers  
53 working in pairs will independently screen all citations and references using specific pre-defined eligibility  
54 criteria. We will screen in two stages: first reviewing titles and abstracts, and second reviewing the full-  
55  
56  
57  
58  
59  
60

1  
2  
3 text. Disagreements in screening will be resolved by discussion and consensus with the help of a third  
4 reviewer if needed.  
5  
6  
7

## 8 9 **Data Extraction and Management**

10  
11 Data extraction will be done independently and in duplicate using pre-designed data abstraction forms.  
12 Abstracted data will include the study title, first author, relevant demographic data, intervention and  
13 control, results for outcomes of interest, and information on the methodological quality for each study. A  
14 third reviewer will resolve discrepancies in data extraction between reviewers.  
15  
16  
17  
18

## 19 **Assessment of risk of bias in included studies**

20  
21 Two reviewers will independently assess the risk of bias of included studies using the Cochrane  
22 Collaboration tool for assessing risk of bias in RCTs [30]. We will assess risk of bias individually for each  
23 outcome. A third reviewer will be available to resolve any disagreements. For each study, we will include  
24 a description for all domains assessed, along with comments if necessary and a final judgment. The risk  
25 of bias of a trial will be categorized as follows: (1) low risk of bias, where bias is not present or if present,  
26 unlikely to affect outcomes, (2) high risk of bias, where outcomes are likely to be significantly affected by  
27 bias, (3) unclear risk of bias, where the reported information is inadequate to properly assess bias.  
28  
29  
30  
31  
32  
33  
34  
35

36  
37 Included trials will be assessed for adequate sequence generation, allocation sequence concealment,  
38 blinding, selective outcome reporting, and other bias. Sequence generation will be considered adequate if  
39 the study explicitly described an appropriate randomization procedure to generate an unpredictable  
40 sequence of allocation, including computerized randomization, use of random number tables, and coin  
41 tossing. Concealment of allocation will be considered adequate if specific methods to protect allocation  
42 were documented and implemented. Performance bias will be considered low if a study reported  
43 participant, caregiver, and/or researcher blinding. Blinding of outcome assessment will be considered  
44 adequate if outcome assessors and adjudicators were blinded. Within-study selective reporting of  
45 outcomes will be examined by reviewing the a priori study protocol, if available. If the study protocol is not  
46 available, we will compare the outcomes listed in the "Methods/design" section with those reported in the  
47 manuscript.  
48  
49  
50  
51  
52  
53  
54  
55  
56  
57  
58  
59  
60

## Measures of treatment effect

When pooling of outcome data is appropriate, RevMan 5.3 software will be used to conduct meta-analyses. We will use the method of DerSimonian and Laird to pool effect sizes for each outcome under a random effects model; study weights will be measured using the inverse variance method. We will present the results as relative risk (RR) with 95% confidence intervals (CIs) for dichotomous outcomes and as mean difference (MD) or standardized mean difference (SMD) with 95% CIs for continuous outcomes.

We plan to perform random effects analysis for all outcomes of interest. If significant unexplained heterogeneity exists, or if there is an insufficient number of RCTs for meta-analysis, we will describe data qualitatively. The number needed to treat (NNT) with 95% CIs will be derived from pooled risk ratios and its 95% CIs utilizing assumed control risk (ACR) for each outcome similar to the approach recommended by the Cochrane collaboration;  $NNT = 1/[ACR \times (1 - RR)]$  [31].

## Dealing with missing data

If we encounter missing data, we will attempt contact the study authors for additional information. If we can not obtain additional data, we will analyze the available data and report the potential impact of missing data in the discussion.

## Assessment of heterogeneity

We will assess for heterogeneity between studies using the chi-squared test for homogeneity, where  $p < 0.10$  indicates substantial heterogeneity, and the  $I^2$  statistic. We consider  $I^2 > 50\%$  to be significant heterogeneity, which will be further investigated with subgroup analyses to assess clinical and methodological sources of heterogeneity in intervention effect.

## Assessment of reporting biases

We will look for potential publication bias using a funnel plot if more than ten trials are included for an outcome. For continuous outcomes, the Egger test [30] will be used to detect funnel plot asymmetry. For

1  
2  
3 dichotomous outcomes, we will use the arcsine test. All analyses will be performed using RevMan or  
4  
5 Stata.  
6  
7  
8

## 9 10 **Subgroup analysis and investigation of heterogeneity**

11 Potential and expected clinical sources of heterogeneity include different patient demographics, dosing  
12 strategies, route of administration, and type of cardiac surgery. To explore significant heterogeneity, if a  
13 sufficient number of trials are available, we will conduct the following pre-specified subgroup analyses  
14  
15 (hypothesized direction of effect in parentheses):  
16  
17

- 18 - Off- versus on-pump cardiac surgery (tranexamic acid is more effective in on-pump surgery)
- 19  
20 - Type of surgery (tranexamic acid is more effective in valvular heart surgery or aortic arch/ascending  
21 aorta surgery as compared to CABG)
- 22  
23 - Combined procedures versus single procedure (tranexamic acid is more effective in combined  
24 procedures)
- 25  
26 - Urgent versus elective surgery (tranexamic acid is more effective in urgent surgeries)
- 27  
28 - Single dose versus multiple doses and/or continuous infusion (multiple doses or continuous infusion  
29 is more effective)
- 30  
31 - High versus low risk for bias studies (tranexamic acid is more effective in high risk of bias studies).

32 We will use the Chi-squared test for each subgroup hypothesis ( $p < 0.10$  for significance). We will conduct  
33 meta-regression to assess the effect of tranexamic dose as a continuous independent variable on the  
34 outcomes using Stata hypothesizing that higher dose is more effective. If subgroups effects are credible,  
35 we will present the outcomes separately for each subgroup.  
36  
37  
38  
39  
40  
41

## 42 **Sensitivity analysis**

43 A priori sensitivity analysis will be performed, excluding studies only reported as abstracts. Post hoc  
44 sensitivity analysis will be performed if required.  
45  
46  
47  
48  
49

## 50 **Assessing the quality of evidence**

51 The Grading of Recommendations Assessment, Development and Evaluation (GRADE) approach will be  
52 used to assess the quality of evidence for each outcome [32]. The GRADE system classifies the quality of  
53 the aggregate body of evidence as high, moderate, low, or very low. The evidence will be evaluated using  
54  
55  
56  
57  
58  
59

1  
2  
3 the following criteria: (1) study design and rigor of its execution (i.e. individual study risk of bias), (2) the  
4 extent to which the evidence could be applied to patients of interest (i.e. directness), (3) the consistency  
5 of results, (4) the analysis of the results (i.e. precision), and (5) the likelihood of publication bias. The  
6 following three factors will increase the quality of evidence if present: (1) a strong or very strong  
7 association between an intervention and the observation of interest, (2) a highly statistically significant  
8 relationship between dose and effect, and (3) a plausible confounding variable that could explain a  
9 reduced effect or could explain an effect if one was not anticipated. We will summarize the overall quality  
10 of evidence for the intervention taking into consideration both desirable and adverse outcomes. We will  
11 include an evidence profile in the results showing the GRADE assessments and pooled analysis per  
12 outcome.  
13  
14  
15  
16  
17  
18  
19  
20  
21

### 22 **Patient and Public Involvement:**

23 We categorized outcomes as we perceived it as clinical experts to be more patient valued into patient  
24 critical and patient important outcomes. but there were no patients involved in the process of selection.  
25  
26  
27  
28  
29

## 30 **DISCUSSION**

31 Bleeding is one of the major complications of cardiac surgeries [5]. The inhibition of fibrinolysis inhibition  
32 using lysine analogues is a common approach used to reduce the intra and post-operative bleeding  
33 associated with cardiac surgery [33]. Tranexamic acid is the most common lysine analogue used in  
34 clinical use. Despite its demonstrated benefits in the prevention of bleeding. Tranexamic acid has not  
35 been shown to reduce mortality in cardiac surgery .. Despite trial level data, the balance between  
36 bleeding prevention and the hypothetical side effects of tranexamic acid remains uncertain.  
37  
38

39 Our systematic review and meta-analysis are intended to summarize the evidence examining the efficacy  
40 and safety of tranexamic acid in patients undergoing cardiac surgery. We will examine the effect of the  
41 type of surgery, patient population and dosing strategies. Strengths of this protocol include a  
42 comprehensive search strategy of published and unpublished literature and application of GRADE  
43 methodology to assess certainty of the estimates of effect. Limitations relate to the anticipated  
44 heterogeneity of the included studies.  
45  
46  
47  
48  
49  
50  
51  
52

53 **Funding statement:** The author(s) received no specific funding for this work

54 **Conflict of interest:** Authors have no conflict of interest to declare.  
55  
56  
57  
58  
59  
60

1  
2  
3 **Acknowledgements** We would like to express our gratitude to Sandy Culley  
4 for guidance in designing and carrying out our search strategy.  
5  
6

7 **Contributors** TA, AA, BR, CA, EB conceived the idea for this systematic review.

8 All authors (TA,AA,DX,SF,JS,EB,AF,TK,KK,RZ,RW,and BR) developed the methodology for the  
9 systematic review. The manuscript was drafted by TA,AA,DX and BR and revised by all authors. TA,AA  
10 and DX will screen potential  
11 studies perform duplicate independent data abstraction, risk of bias assessment  
12 and GRADE assessment with help from other authors. BR  
13 will conduct the data synthesis. BR is the guarantor of the review.  
14  
15  
16  
17

18 **Ethics and dissemination:** Formal ethical approval is not required as primary data will not be collected.  
19 The results will be disseminated through a peer-reviewed publication  
20  
21  
22  
23  
24  
25  
26  
27  
28  
29  
30  
31  
32  
33  
34  
35  
36  
37  
38  
39  
40  
41  
42  
43  
44  
45  
46  
47  
48  
49  
50  
51  
52  
53  
54  
55  
56  
57  
58  
59  
60

## References:

1. Sullivan, M. T., Cotten, R., Read, E. J., & Wallace, E. L. (2007). Blood collection and transfusion in the United States in 2001. *Transfusion*, 47(3), 385-394.
2. Colson PH, Gaudard P, Fellahi J-L, Bertet H, Faucanie M, Amour J, et al. Active Bleeding after Cardiac Surgery: A Prospective Observational Multicenter Study. *PLoS ONE*. 2016 Sep 2;11(9):e0162396.
3. Kristensen KL, Rauer LJ, Mortensen PE, Kjeldsen BJ. Reoperation for bleeding in cardiac surgery. *Interactive Cardiovascular and Thoracic Surgery*. 2012 Jun;14(6):709-713.
4. Vivacqua A, Koch CG, Yousuf AM, Nowicki ER, Houghtaling PL, Blackstone EH, Sabik JF 3rd. Morbidity of bleeding after cardiac surgery: is it blood transfusion, reoperation for bleeding, or both? *Ann Thorac Surg*. 2011 Jun;91(6): 1780-90.
5. Paparella D et al. Activation of the coagulation system during coronary artery bypass grafting: comparison between on-pump and off-pump techniques. *J Thorac Cardiovasc Surg*. 2006 Feb;131(2):290-7.
6. Ickx BE, Faraoni D. Management of the clotting system: a European perspective. *Curr Opin Anaesthesiol*. 2012 Feb;25(1): 80-85.
7. Hess PJ Jr. Systemic inflammatory response to coronary artery bypass graft surgery. *Am J Health Syst Pharm*. 2005 Sep 15;62:S6-S9.
8. Pagano D, Milojevic M, Meesters MI, Benedetto U, Bolliger D, Von Heymann C, Jeppsson A, Koster A, Osnabrugge RL, Ranucci M, Ravn HB, Vonk ABA, Wahba A, Boer C. 2017 EACTS/EACTA Guidelines on patient blood management for adult cardiac surgery. *Eur J Cardiothorac Surg* 2018 Jan 1;53(1):79-111.
9. Ker, K., Edwards, P., Perel, P., Shakur, H., & Roberts, I. (2012). Effect of tranexamic acid on surgical bleeding: systematic review and cumulative meta-analysis. *Bmj*, 344, e3054.
10. CRASH-2 trial collaborators. Effects of tranexamic acid on death, vascular occlusive events, and blood transfusion in trauma patients with significant haemorrhage (CRASH-2). *The Lancet*. 2010 Jul;376(9734):23-32.
11. Ferraris et al .2011 Update to The Society of Thoracic Surgeons and the Society of Cardiovascular Anesthesiologists Blood Conservation Clinical Practice Guidelines. *Ann Thorac Surg* 2011Mar;91(3):944-82.
12. Dunn CJ, Goa KL. Tranexamic acid: a review of its use in surgery and other indications. *Drugs*. 1999 Jun;57(6):1005-32.
13. Lukes AS et al. Tranexamic acid for heavy menstrual bleeding. *Obstetrics & Gynecology*. 2010 Oct;116(4):865-75.
14. Sukeik M, Alshryda S, Haddad FS, Mason JM. Systematic review and meta-analysis of the use of tranexamic acid in total hip replacement. *J Bone Joint Surg Br*. 2011 Jan;93(1):39-46.
15. Morrison JJ, Dubose JJ, Rasmussen TE, Midwinter MJ. Military Application of Tranexamic Acid in Trauma Emergency Resuscitation (MATTERs) Study. *Arch Surg*. 2012 Feb;147(2):113-119.
16. Brown JR, Birkmeyer NJ, O'Connor GT. Meta-analysis comparing the effectiveness and adverse outcomes of antifibrinolytic agents in cardiac surgery. *Circulation*. 2007 Jun;115(22):2801-13.
17. Sharma V, Katznelson R, Jerath A, Garrido-Olivares L, Carroll J, Rao V, Wasowicz M, Djaiani G. The association between tranexamic acid and convulsive seizures after cardiac surgery: a multivariate analysis in 11 529 patients. *Anaesthesia* 2014 Feb;69(2):124-30.

18. Koster A, Börgermann J, Zittermann A, Lueth JU, Gillis-Januszewski T, Schirmer U. Moderate dosage of tranexamic acid during cardiac surgery with cardiopulmonary bypass and convulsive seizures: incidence and clinical outcome. *Br J Anaesth*. 2013 Jan;110(1):34–40.
19. Zhou, Zhen-feng, Feng-jiang Zhang, Yang-fan Huo, Yun-xian Yu, Li-na Yu, Kai Sun, Li-hong Sun, Xiu-fang Xing, and Min Yan. "Intraoperative tranexamic acid is associated with postoperative stroke in patients undergoing cardiac surgery." *PloS one* 12, no. 5 (2017): e0177011.
20. ATACAS Investigators. Tranexamic acid in patients undergoing coronary-artery surgery. *N Engl J Med* 2017 Jan;376(2):136-48.
21. Michael A. Borger, Joan Ivanov, Richard D. Weisel, Vivek Rao, Charles M. Peniston; Stroke during coronary bypass surgery: principal role of cerebral macroemboli. *European Journal of Cardio-Thoracic Surgery*. 2001 May;19(5):627–632.
22. Sander M et al. Mortality associated with administration of high-dose tranexamic acid and aprotinin in primary open-heart procedures: a retrospective analysis. *Critical Care* 2010;14(4):R148.
23. Sigaut S, Tremey B, Ouattara A, Couturier R, Taberlet C, Grassin-Delyle S, Dreyfus JF, Schlumberger S, Fischler M. Comparison of two doses of tranexamic acid in adults undergoing cardiac surgery with cardiopulmonary bypass. *Anesthesiology* 2014 Mar;120(3):590-600.
24. Waldow T, Szlapka M, Haferkorn M, Bürger L, Plötze K, Matschke K. Prospective clinical trial on dosage optimizing of tranexamic acid in non-emergency cardiac surgery procedures. *Clin Hemorheol Microcirc* 2013 Jan;55(4):457-68.
25. McCormack, P.L. Tranexamic Acid: A review of its Use in the Treatment of Hyperfibrinolysis. *Drugs*. 2012 Mar;72(5):585–617
26. Amy L. Cilia La Corte, Helen Philippou, Robert A.S. Ariëns. Role of Fibrin Structure in Thrombosis and Vascular Disease. *Advances in Protein Chemistry and Structural Biology*. 2011;83: 75-127.
27. Sniecinski RM, Chandler WL. Activation of the hemostatic system during cardiopulmonary bypass. *Anesth Analg*. 2011 Dec;113(6):1319-33.
28. McIlroy DR, Myles PS, Phillips LE, Smith JA. Antifibrinolytics in cardiac surgical patients receiving aspirin: a systematic review and meta-analysis. *Br J Anaesth*. 2009 Feb;102(2):168–78.
29. Dai Z, Chu H, Wang S, Liang Y. The effect of tranexamic acid to reduce blood loss and transfusion on off-pump coronary artery bypass surgery: A systematic review and cumulative meta-analysis. *J Clin Anesth*. 2018 Feb;44:23-31.
30. Higgins JP, Altman DG, Gøtzsche PC, Jüni P, Moher D, Oxman AD, et al. The Cochrane Collaboration's tool for assessing risk of bias in randomised trials. *BMJ*. 2011;343:d5928.
31. Higgins JPT, Green S, eds. *Cochrane Handbook for Systematic Reviews of Interventions* Version 5.1.0 [updated March 2011]. The Cochrane Collaboration, 2011. Available from [www.cochrane-handbook.org](http://www.cochrane-handbook.org).
32. Guyatt GH, Oxman AD, Vist GE, Kunz R, Falck-Ytter Y, Alonso-Coello P, et al. GRADE: an emerging consensus on rating quality of evidence and strength of recommendations. *BMJ*. 2008;336 (7650):924–6.
33. Katsaros D et al. Tranexamic acid reduces postbypass blood use.. *Ann Thorac Surg*. 1996 Apr;61(4):1131-5.



1  
2  
3  
4  
5  
6  
7  
8  
9  
10  
11  
12  
13  
14  
15  
16  
17  
18  
19  
20  
21  
22  
23  
24  
25  
26  
27  
28  
29  
30  
31  
32  
33  
34  
35  
36  
37  
38  
39  
40  
41  
42  
43  
44  
45  
46  
47  
48  
49  
50  
51  
52  
53  
54  
55  
56  
57  
58  
59  
60

For peer review only

Database: Embase <1974 to 2018 September 10> Search Strategy:

1 1 exp antifibrinolytic agent/ (28330)  
 2 2 (anti-fibrinolytic\* or antifibrinolytic\* or antifibrinolysin\* or anti-fibrinolysin\* or antiplasmin\* or antiplasmin\* or ((plasmin  
 3 or fibrinolysis) adj3 inhibitor\*)).mp. (13957)  
 4 3 exp aprotinin/ (11678)  
 5 4 (Aprotinin\* or kallikrein-trypsin inactivator\* or bovine kunitz pancreatic trypsin inhibitor\* or bovine pancreatic trypsin  
 6 inhibitor\* or basic pancreatic trypsin inhibitor\* or BPTI or contrykal or kontrykal or kontrikal or contrical or dilmintal or  
 7 iniprol or zymofren or traskolan or antilysin or pulmin or amicar or caprocid or epsamon or epsikapron or antilysin or iniprol  
 8 or kontrikal or kontrykal or pulmin\* or Trasylol or Antilysin Spofa or rp?9921 or antagosan or antilysin or antilyline or  
 9 apronitin\* or apronitrine or bayer a?128 or bovine pancreatic secretory trypsin inhibitor\* or contrycal or frey inhibitor\* or  
 10 gordox or kallikrein trypsin inhibitor\* or kazal type trypsin inhibitor\* or (Kunitz adj3 inhibitor\*) or midran or (pancrea\* adj2  
 11 antitrypsin) or (pancrea\* adj2 trypsin inhibitor\*) or riker?52g or rp?9921or tracylol or trascolan or trasilol or traskolan or  
 12 trazylol or zymofren or zymophren).mp. (15442)  
 13 5 exp tranexamic acid/ (10966)  
 14 6 (tranexamic or Cyclohexanecarboxylic Acid\* or Methylamine\* or amcha or trans-4-aminomethylcyclohexanecarboxylic  
 15 acid\* or t-amcha or amca or kabi 2161 or transamin\* or exacyl or amchafibrin or anvitoff or spotof or cyklokapon or ugurol  
 16 or amino methylcyclohexane carboxylate or aminomethylcyclohexanecarbonic acid or aminomethylcyclohexanecarboxylic  
 17 acid or AMCHA or amchafibrin or amikapron or aminomethyl cyclohexane carboxylic acid or aminomethyl  
 18 cyclohexanecarboxylic acid or aminomethylcyclohexane carbonic acid or aminomethylcyclohexane carboxylic acid or  
 19 aminomethylcyclohexanecarbonic acid or aminomethylcyclohexanecarboxylic acid or aminomethylcyclohexanecarboxylic  
 20 acid or aminomethylcyclohexanoic acid or amstat or anvitoff or cl?65336 or cl65336 or cyclocapron or cyclokapon or  
 21 cyclocapron or exacyl or frenolyse or hexacapron or hexakapron or tranex or TXA).mp. (58514)  
 22 7 exp Aminocaproic Acids/ or exp 6-Aminocaproic Acid/ (5997)  
 23 8 (((aminocaproic or amino?caproic or aminohexanoic or amino?hexanoic or epsilon-aminocaproic or E-aminocaproic)  
 24 adj2 acid\*) or epsikapron or cy-116 or cy116 or epsamon or amicar or caprocid or lederle or Aminocaproic or  
 25 aminohexanoic or amino caproic or amino n hexanoic or acikaprin or afibrin or capracid or capramol or caprogel or  
 26 caprolest or caprolisine or caprolysin or capromol or cl 10304 or EACA or eaca roche or ecapron or ekaprol or epsamon  
 27 or epsicapron or epsilcapramin or epsilon amino caproate or epsilon aminocaproate or epsilonaminocaproic or  
 28 etha?aminocaproic or ethaaminocaproich or emocaprol or hepin or ipsilon or jd?177or neocaprol or nsc?26154 or  
 29 tachostyptan).mp. (16163)  
 30 9 1 or 2 or 3 or 4 or 5 or 6 or 7 or 8 (95478)  
 31 10 exp cardiovascular surgery/ (612911)  
 32 11 exp heart surgery/ (325152)  
 33 12 exp heart valve surgery/ (82677)  
 34 13 exp thorax surgery/ (524265)  
 35 14 exp coronary artery surgery/ (114219)  
 36 15 exp coronary artery bypass graft/ (67199)  
 37 16 exp coronary artery bypass surgery/ (15326)  
 38 17 exp thorax/su [Surgery] (1103)  
 39 18 exp coronary artery bypass/ (67199)  
 40 19 exp sternotomy/ (17164)  
 41 20 exp sternum/su [Surgery] (877)  
 42 21 exp heart valve/su [Surgery] (3320)  
 43 22 exp off pump coronary surgery/ (5258)  
 44 23 (exp heart/ or exp heart valve/ or exp heart disease/ or exp coronary artery disease/) and (su.fs. or surgery.mp. or  
 45 surgeries.mp. or surgical.mp. or operate.mp. or operation.mp. or operations.mp. or bypass.mp. or stent\*.mp. or graft\*.mp.  
 46 or repair.mp.) (493732)  
 47 24 ((heart or cardiac or coronary or cardiothoracic or cardio-thoracic or thoracic or cardio-pulmonary or  
 48 cardiopulmonary or aortic or mitral or arch or on pump or off pump) adj3 (surgery or surgeries or surgical or operate or  
 49 operation or operations or bypass or stent\* or graft\*)).mp. (330250)  
 50 25 (coronary artery bypass or coronary artery surgery or coronary bypass graft surgery or coronary artery bypass graft  
 51 or coronary bypass graft or coronary artery bypass graft\* or coronary artery bypass graft\* or coronary artery graft\* or  
 52 CABG).mp. (100527)  
 53 26 10 or 11 or 12 or 13 or 14 or 15 or 16 or 17 or 18 or 19 or 20 or 21 or 22 or 23 or 24 or 25 (1056258)  
 54 27 9 and 26 (6799)  
 55 28 randomi?ed.ab,ti,kw. or randomized controlled trial.pt. or controlled clinical trial.pt. or placebo.ab,ti,kw. or clinical  
 56 trials as topic.sh. or random\*.ab,ti,kw. or trial.ti. (1500424)  
 57 29 (crossover procedure or double-blind procedure or randomized controlled trial or single-blind procedure).de. or  
 58 ((((((random\* or factorial\* or crossover\* or cross over\* or placebo\* or assign\* or allocat\* or volunteer\* or singl\*) adj1 blind\*)  
 59 or cross) adj1 over\*) or doubl\*) adj1 blind\*).de,ab,ti. (639992)  
 60 30 28 or 29 (1622208)  
 31 9 and 26 and 30 (1237)

\*\*\*\*\*

1  
2  
3  
4  
5  
6  
7  
8  
9  
10  
11  
12  
13  
14  
15  
16  
17  
18  
19  
20  
21  
22  
23  
24  
25  
26  
27  
28  
29  
30  
31  
32  
33  
34  
35  
36  
37  
38  
39  
40  
41  
42  
43  
44  
45  
46  
47  
48  
49  
50  
51  
52  
53  
54  
55  
56  
57  
58  
59  
60

For peer review only

**PRISMA-P (Preferred Reporting Items for Systematic review and Meta-Analysis Protocols) 2015 checklist: recommended items to address in a systematic review protocol\***

| Section and topic                 | Item No | Checklist item                                                                                                                                                                                                                           | Page Number |
|-----------------------------------|---------|------------------------------------------------------------------------------------------------------------------------------------------------------------------------------------------------------------------------------------------|-------------|
| <b>ADMINISTRATIVE INFORMATION</b> |         |                                                                                                                                                                                                                                          |             |
| Title:                            |         |                                                                                                                                                                                                                                          |             |
| Identification                    | 1a      | Title : Tranexamic Acid in Cardiac Surgery: a systematic review and meta-analysis (protocol)                                                                                                                                             | Page 1      |
| Update                            | 1b      | N/A                                                                                                                                                                                                                                      |             |
| Registration                      | 2       | PROSPERO registration number CRD42018105904                                                                                                                                                                                              | Pg 2        |
| Authors:                          |         |                                                                                                                                                                                                                                          |             |
| Contact                           | 3a      | Provided name, institutional affiliation, e-mail address of all protocol authors; provide physical mailing address of corresponding author                                                                                               | Page 1      |
| Contributions                     | 3b      | Describe contributions of protocol authors and identify the guarantor of the review                                                                                                                                                      | Page 8      |
| Amendments                        | 4       | N/A                                                                                                                                                                                                                                      |             |
| Support:                          |         |                                                                                                                                                                                                                                          |             |
| Sources                           | 5a      | The author(s) received no specific funding for this work                                                                                                                                                                                 | Pg 2,8      |
| Sponsor                           | 5b      | N/A                                                                                                                                                                                                                                      |             |
| Role of sponsor or funder         | 5c      | N/A                                                                                                                                                                                                                                      |             |
| <b>INTRODUCTION</b>               |         |                                                                                                                                                                                                                                          |             |
| Rationale                         | 6       | Rationale intended to summarize the evidence examining the efficacy and safety of TXA in cardiac surgery in abstract pg 2 and under why it is important to do this review pages 3 and 4                                                  | Pg2-4       |
| Objectives                        | 7       | PICO question was explained under Methods/Design on page 4 under types of studies ,participants, intervention and comparator and outcome measures                                                                                        | Pg 4        |
| <b>METHODS</b>                    |         |                                                                                                                                                                                                                                          |             |
| Eligibility criteria              | 8       | explained under Methods/Design on page 4 under types of studies, participants, intervention and comparator and outcome measures                                                                                                          | Page 4      |
| Information sources               | 9       | Describe all intended information sources (such as electronic databases, contact with study authors, trial registers or other grey literature sources) with planned dates of coverage under search methods and searching other resources | Pg.4-5      |
| Search strategy                   | 10      | Uploaded separately as a supplementary document “EMBASE search strategy”                                                                                                                                                                 | Suppl       |
| Study records:                    |         |                                                                                                                                                                                                                                          |             |

1  
2  
3  
4  
5  
6  
7  
8  
9  
10  
11  
12  
13  
14  
15  
16  
17  
18  
19  
20  
21  
22  
23  
24  
25  
26  
27  
28  
29  
30  
31  
32  
33  
34  
35  
36  
37  
38  
39  
40  
41  
42  
43  
44  
45  
46

|                                    |     |                                                                                                                    |          |
|------------------------------------|-----|--------------------------------------------------------------------------------------------------------------------|----------|
| Data management                    | 11a | Described under data collection and analysis                                                                       | Page 5   |
| Selection process                  | 11b | Under data collection and analysis                                                                                 | Page 5   |
| Data collection process            | 11c | method of extracting data from reports was mentioned under data collection and analysis                            | Pg 5     |
| Data items                         | 12  | General data items were described under data extraction and analysis                                               | Page 5   |
| Outcomes and prioritization        | 13  | Described under type of outcome measures                                                                           | Page 4   |
| Risk of bias in individual studies | 14  | methods for assessing risk of bias of individual studies under assessment of risk of bias in included studies      | Page 5-6 |
| Data synthesis                     | 15a | Explained under Measures of treatment effect pg6 and subgroup analysis and investigation of heterogeneity page 6-7 | Page 6-7 |
|                                    | 15b | explained under Measures of treatment effect                                                                       | Page 6   |
|                                    | 15c | Was explained under subgroup analysis and investigation of heterogeneity                                           | Page 6   |
|                                    | 15d | explained under Measures of treatment effect                                                                       | Page 6   |
| Meta-bias(es)                      | 16  | Under Assessment of risk of bias pg5, Assessment of reporting biases pg 6, assessing quality of evidence pg7       | Page 5-7 |
| Confidence in cumulative evidence  | 17  | Under assessing quality of evidence                                                                                | Page 7   |

**\* It is strongly recommended that this checklist be read in conjunction with the PRISMA-P Explanation and Elaboration (cite when available) for important clarification on the items. Amendments to a review protocol should be tracked and dated. The copyright for PRISMA-P (including checklist) is held by the PRISMA-P Group and is distributed under a Creative Commons Attribution Licence 4.0.**

*From: Shamseer L, Moher D, Clarke M, Ghersi D, Liberati A, Petticrew M, Shekelle P, Stewart L, PRISMA-P Group. Preferred reporting items for systematic review and meta-analysis protocols (PRISMA-P) 2015: elaboration and explanation. BMJ. 2015 Jan 2;349(jan02 1):g7647.*

# BMJ Open

## Tranexamic Acid in Cardiac Surgery: a systematic review and meta-analysis (protocol)

|                                 |                                                                                                                                                                                                                                                                                                                                                                                                                                                                                                                                                                                                                                                                                                                                                                                                                                                                                                                                                                                                        |
|---------------------------------|--------------------------------------------------------------------------------------------------------------------------------------------------------------------------------------------------------------------------------------------------------------------------------------------------------------------------------------------------------------------------------------------------------------------------------------------------------------------------------------------------------------------------------------------------------------------------------------------------------------------------------------------------------------------------------------------------------------------------------------------------------------------------------------------------------------------------------------------------------------------------------------------------------------------------------------------------------------------------------------------------------|
| Journal:                        | <i>BMJ Open</i>                                                                                                                                                                                                                                                                                                                                                                                                                                                                                                                                                                                                                                                                                                                                                                                                                                                                                                                                                                                        |
| Manuscript ID                   | bmjopen-2018-028585.R2                                                                                                                                                                                                                                                                                                                                                                                                                                                                                                                                                                                                                                                                                                                                                                                                                                                                                                                                                                                 |
| Article Type:                   | Protocol                                                                                                                                                                                                                                                                                                                                                                                                                                                                                                                                                                                                                                                                                                                                                                                                                                                                                                                                                                                               |
| Date Submitted by the Author:   | 27-Aug-2019                                                                                                                                                                                                                                                                                                                                                                                                                                                                                                                                                                                                                                                                                                                                                                                                                                                                                                                                                                                            |
| Complete List of Authors:       | Alaifan, Thamer; McMaster University Department of Medicine, Alenazy, Ahmed; McMaster University Department of Medicine, critical care<br>Xiang Wang , Dominic; Western University Department of Medicine<br>Fernando, Shannon; University of Ottawa, Department of Emergency Medicine<br>Spence, Jessica; McMaster University, Departments of Anesthesia and Clinical Epidemiology and Biostatistics<br>Belley-Cote, Emilie; McMaster University; Universite de Sherbrooke, Medicine<br>Fox-Robichaud, Alison; McMaster University, Medicine<br>Ainswoth, Craig; McMaster University Department of Medicine, Critical care , cardiology<br>Karachi, Tim; McMaster University, Medicine<br>Kyeremanteng , Kwadwo ; University of Ottawa Faculty of Medicine, critical care<br>Zarychanski, Ryan ; University of Manitoba, Sections of Critical Care and Hematology/Medical Oncology<br>Whitlock, Richard; McMaster University, Surgery<br>Rochweg, Bram; McMaster University, Medicine (Critical Care) |
| <b>Primary Subject Heading</b>: | Cardiovascular medicine                                                                                                                                                                                                                                                                                                                                                                                                                                                                                                                                                                                                                                                                                                                                                                                                                                                                                                                                                                                |
| Secondary Subject Heading:      | Haematology (incl blood transfusion)                                                                                                                                                                                                                                                                                                                                                                                                                                                                                                                                                                                                                                                                                                                                                                                                                                                                                                                                                                   |
| Keywords:                       | Anaesthesia in cardiology < ANAESTHETICS, Thromboembolism < CARDIOLOGY, Bleeding disorders & coagulopathies < HAEMATOLOGY, Stroke < NEUROLOGY                                                                                                                                                                                                                                                                                                                                                                                                                                                                                                                                                                                                                                                                                                                                                                                                                                                          |
|                                 |                                                                                                                                                                                                                                                                                                                                                                                                                                                                                                                                                                                                                                                                                                                                                                                                                                                                                                                                                                                                        |

SCHOLARONE™  
Manuscripts

## Tranexamic Acid in Cardiac Surgery: a systematic review and meta-analysis (protocol)

Alaifan T<sup>1,2</sup>, Alenazy A<sup>1,2</sup>, Xiang Wang D<sup>3</sup>, Fernando S<sup>4,5</sup>, Spence J<sup>6,7</sup>, Belley-Cote E<sup>2,7,8,9</sup>, Fox-Robichaud A<sup>2</sup>, Ainsworth C<sup>2,8</sup>, Karachi T<sup>2</sup>, Kyeremanteng K<sup>4,11</sup>, Zarychanski R<sup>12</sup>, Whitlock R<sup>7,9,10</sup>, Rochweg B<sup>2,11</sup>.

1 first and second author contributed equally

2 Department of Medicine, Division of Critical Care, McMaster University

3 Schulich School of Medicine and Dentistry, University of Western Ontario

4 Division of Critical Care, Department of Medicine, University of Ottawa, Ottawa, ON

5 Department of Emergency Medicine, University of Ottawa, Ottawa, ON

6 Department of Anesthesia and Critical Care; McMaster University

7 Population Health Research Institute, McMaster University

8 Department of Medicine, Division of Cardiology, McMaster University

9 Department of Health Research Methods, Evidence & Impact, McMaster University, Hamilton, ON

10 Department of Surgery, Division of Cardiac Surgery, McMaster University

11 Clinical Epidemiology Program, Ottawa Hospital Research Institute, Ottawa, ON.

12 Department of Internal Medicine, Sections of Critical Care Medicine and of Hematology/Medical Oncology, University of Manitoba, Winnipeg, Canada

Email: [alaifan@gmail.com](mailto:alaifan@gmail.com), [Dr.alenazy@hotmail.com](mailto:Dr.alenazy@hotmail.com), [dwang2021@meds.uwo.ca](mailto:dwang2021@meds.uwo.ca), [sfernando@qmed.ca](mailto:sfernando@qmed.ca), [jessicaspence13@gmail.com](mailto:jessicaspence13@gmail.com), [Emilie.Belley-Cote@phri.ca](mailto:Emilie.Belley-Cote@phri.ca), [afoxrob@mcmaster.ca](mailto:afoxrob@mcmaster.ca), [ainswoc@mcmaster.ca](mailto:ainswoc@mcmaster.ca), [karachi@mcmaster.ca](mailto:karachi@mcmaster.ca), [kwadwo77@gmail.com](mailto:kwadwo77@gmail.com), [rzarychanski@cancercare.mb.ca](mailto:rzarychanski@cancercare.mb.ca), [Richard.Whitlock@phri.ca](mailto:Richard.Whitlock@phri.ca), [rochweg@mcmaster.ca](mailto:rochweg@mcmaster.ca)

### Corresponding Author and Reprint Requests:

Dr. Bram Rochweg

Department of Medicine, Division of Critical Care

Juravinski Hospital

711 Concession St, Hamilton ON

L8V 1C1

e-mail: [rochweg@mcmaster.ca](mailto:rochweg@mcmaster.ca)

1  
2  
3  
4  
5  
6  
7  
8  
9  
10  
11  
12  
13  
14  
15  
16  
17  
18  
19  
20  
21  
22  
23  
24  
25  
26  
27  
28  
29  
30  
31  
32  
33  
34  
35  
36  
37  
38  
39  
40  
41  
42  
43  
44  
45  
46  
47  
48  
49  
50  
51  
52  
53  
54  
55  
56  
57  
58  
59  
60

For peer review only



## Abstract

**Introduction:** Bleeding during cardiac surgery is associated with increased morbidity and mortality. Tranexamic acid is an antifibrinolytic with proven efficacy in major surgeries. Current clinical practice guidelines recommend intraoperative use in cardiac procedures. However, several complications have been reported with tranexamic acid including seizures. This review intends to summarize the evidence examining the efficacy and safety of tranexamic acid in patients undergoing cardiac surgery.

**Methods/design:** We will search MEDLINE, EMBASE, PubMed, ACPJC, CINAHL, and the Cochrane trial registry for eligible randomized controlled trials, the search dates for all databases will be from inception until January 1st 2019, investigating the peri-operative use of topical and/or intravenous tranexamic acid as a stand-alone antifibrinolytic agent compared to placebo in patients undergoing open cardiac surgery. We categorized outcomes as patient critical or patient important. Selected patient-critical outcomes are: mortality (ICU, hospital and 30-day endpoints), re-operation within 24 hours, post-operative bleeding requiring transfusion of packed red blood cells, myocardial infarction, stroke, pulmonary embolism, bowel infarction, upper or lower limb deep vein thrombosis, and seizures. Those outcomes, we perceived as clinical experts to be most patient valued and patients were not involved in outcomes selection process.

We will not apply publication date, language, journal, or methodological quality restrictions. Two reviewers will independently screen and identify eligible studies using predefined eligibility criteria and then review full reports of all potentially relevant citations. A third reviewer will resolve disagreements if consensus cannot be achieved.

We will present the results as relative risk (RR) with 95% confidence intervals for dichotomous outcomes and as mean difference (MD) or standardized mean difference (SMD) for continuous outcomes with 95% confidence intervals. We will assess the quality of evidence using the Grading of Recommendations, Assessment, Development and Evaluation (GRADE) approach.

**Ethics and dissemination:** Formal ethical approval is not required as primary data will not be collected. The results will be disseminated through a peer-reviewed publication

**Systematic review registration:** Protocol was registered with the International Prospective Register of Systematic Reviews (PROSPERO) on 26 October 2018 (registration number CRD42018105904).

**Funding statement:** The author(s) received no specific funding for this work

**Keywords:** Tranexamic acid, Cardiac surgery, Systematic review, Meta-analysis, Mortality,

1  
2  
3 Bleeding, Seizure.  
4  
5  
6  
7

## 8 **Article Summary:**

9 Strengths and Limitations of this protocol include:

- 11 • A comprehensive search strategy of published and unpublished literature
- 12 • Application of grade methodology to assess certainty of the estimates of effect
- 13 • Limitations relate to the anticipated heterogeneity of the included studies including dosing
- 14 strategy, timing, type of surgery and preoperative antiplatelets therapy.
- 15
- 16
- 17
- 18
- 19
- 20
- 21
- 22
- 23
- 24
- 25
- 26

## 27 **Background**

### 28 **Description of the condition**

29  
30  
31  
32 Surgical patients in the United States receive 15 million units of red blood cell transfusions annually,  
33 cardiac surgical procedures utilize as much as 10% to 15% of this [1]. Peri-operative bleeding is a  
34 common complication and is associated with the need for transfusion and re-operation [2,3]. These  
35 factors impact negatively on postoperative morbidity, mortality, and costs [4]. Coagulopathy, a contributor  
36 to excessive bleeding, is linked to the use of cardiopulmonary bypass, which leads to the activation of the  
37 intrinsic and extrinsic coagulation pathway, platelet dysfunction, and systemic inflammatory response  
38 [5,6,7]. As such, measures to prevent perioperative coagulopathy are recommended [8]. To this end,  
39 antifibrinolytic agents are used to prevent the breakdown of blood clots by plasmin.  
40  
41  
42  
43  
44  
45

46 Tranexamic acid is an antifibrinolytic agent that has been shown to reduce bleeding in major surgeries and  
47 trauma patients [9-10]. As a result, current clinical practice guidelines recommend its use in many  
48 perioperative settings, including cardiac surgery [11].  
49  
50

### 51 **Description of the Intervention**

52  
53  
54 Tranexamic acid acts by reversibly blocking the lysine binding sites of plasminogen, thus preventing  
55 plasmin activation and, as a result, the lysis of polymerized fibrin [12]. Tranexamic acid is frequently  
56  
57  
58  
59  
60

1  
2  
3 utilized to enhance hemostasis, particularly when fibrinolysis contributes to bleeding. In clinical practice,  
4 tranexamic acid has been used to treat menorrhagia, trauma-associated bleeding, and to prevent  
5 perioperative bleeding associated with orthopedic and cardiac surgery [13-16]. Importantly, the use of  
6 tranexamic acid is not without adverse effects. Tranexamic acid has been associated with seizures  
7 [17,18], as well as concerns of possible increased thromboembolic events, including stroke which to-date  
8 have not been demonstrated in randomized controlled trials [19-20]. Stroke after cardiac surgery might  
9 lead to increased mortality and morbidity, in addition to increased intensive care unit (ICU) and hospital  
10 lengths of stay (LOS) [21-22]. Moreover, both the route and quantity for administration of tranexamic acid  
11 has varied across cardiac surgery trials [23,24]. Tranexamic acid can be administered orally, topically,  
12 and intravenously. Topical and intravenous administration are most common in perioperative cardiac  
13 surgeries.  
14  
15  
16  
17  
18  
19  
20  
21  
22  
23

## 24 **How does the intervention work?**

25  
26 Fibrinolysis is the mechanism of clot breakdown and involves a cascade of interactions between  
27 zymogens and enzymes that act in concert with clot formation to maintain blood flow [25]. During  
28 extracorporeal circulation, such as cardiopulmonary bypass (CPB) used in cardiac surgery, multiplex  
29 changes in hemostasis arise that include accelerated thrombin generation, platelet dysfunction, and  
30 enhanced fibrinolysis [26]. Tranexamic acid inhibits fibrinolysis, a putative mechanism of bleeding after  
31 cardiopulmonary bypass, by forming a reversible complex with plasminogen [27].  
32  
33  
34  
35  
36  
37  
38  
39  
40

## 41 **Why it is important to do this review**

42 Currently, no definitive and up-to-date meta-analysis summarizes the efficacy and potential for harm of  
43 tranexamic acid in cardiac surgery. Several meta-analyses have been conducted, but they did not include  
44 recent large randomized controlled trials (RCTs) [20] or comprehensively looked at both efficacy and  
45 harm. Furthermore, one of these reviews grouped tranexamic acid with aprotinin and aminocaproic acid  
46 [28] while the most recent meta-analysis studied the effect in patients undergoing CABG without the use  
47 of cardiopulmonary bypass [29].  
48  
49  
50  
51

## 52 **Objectives**

1  
2  
3 We plan to conduct a systematic review and meta-analysis of RCTs to investigate the use of tranexamic  
4 acid in adult patients underwent cardiac surgery.  
5  
6  
7

## 8 **Methods/design**

### 9 **Types of studies**

10  
11 We will only include RCTs which studied tranexamic acid in adults who underwent open cardiac surgery..  
12  
13 We will impose no language or methodological quality restrictions.  
14  
15  
16

### 17 **Types of participants**

18  
19 The population of interest is adult patients (18 years of age or older) who underwent open cardiac surgery  
20 including but not limited to CABG (on- or off-pump and midline sternotomy or thoracotomy), valve  
21 surgery, or ascending aorta and arch surgery including combined surgeries. We will exclude studies  
22 investigating transcatheter valvular procedures.  
23  
24  
25  
26  
27  
28

### 29 **Types of interventions and comparators**

30  
31 The intervention of interest is administration of tranexamic acid in the perioperative period (defined as  
32 between 24 hours pre-operatively and up to 24 hours post-operatively). We will include studies that  
33 examined the intravenous and topical mode of delivery of tranexamic acid and will include all dosing  
34 strategies. We will exclude studies that did not use tranexamic acid as a stand-alone agent (i.e. in  
35 combination with another antifibrinolytic). The comparator or control group must include only patients who  
36 did not receive antifibrinolytic agents (either usual care or placebo).  
37  
38  
39  
40  
41  
42  
43  
44

### 45 **Types of outcome measures**

46  
47 We will focus on outcomes we perceive as clinical experts to be most patient-important in order to assess  
48 the efficacy and safety of tranexamic acid. We categorized outcomes from a patient-perspective as either  
49 critical or important. The selected critical outcomes are: mortality (ICU, hospital and 30-day endpoints),  
50 re-operation within 24 hours, post-operative bleeding requiring transfusion of packed red blood cells,  
51 myocardial infarction(MI), stroke, venous thrombo-embolism (VTE) within 3 months (that includes  
52  
53  
54  
55  
56  
57  
58  
59  
60

1  
2  
3 pulmonary embolism (PE), upper or lower limb deep vein thrombosis (DVT)), bowel infarction and  
4 seizures. The important outcomes are: bleeding (defined as chest tube output in milliliter within 24 hours  
5 post-operatively), transfusion of other blood products (fresh frozen plasma and platelets), ICU length of  
6 stay, and hospital length of stay. For thromboembolic complications: MI, stroke, VTE and bowel infarction  
7 we will capture harm to the longest duration of follow-up available in the included studies up to 3 months  
8 following surgery. The time frame for all other outcomes is during ICU stay unless otherwise mentioned.  
9  
10  
11  
12  
13  
14  
15

## 16 **Search methods for identification of studies**

17  
18 We will search the following electronic databases: MEDLINE, EMBASE, PubMed, ACPJC, CINAHL, and  
19 the Cochrane trial registry from inception for eligible articles with no language restriction. Keyword search  
20 terms include tranexamic acid, antifibrinolytic, coronary artery bypass grafting, cardiac surgery, cardiac  
21 valve surgery, ascending aorta and arch surgery, lysine analogue, bleeding, re-sternotomy and CABG;  
22 detailed search strategy (supplementary file). search dates for all databases will be from inception until  
23 January 1st, 2019. Although we plan to update the search just prior to submission to ensure it is as up to  
24 date as possible  
25  
26  
27  
28  
29  
30  
31  
32

## 33 **Searching other resources**

34  
35 Two reviewers will independently search for eligible articles. In addition, we will search for unpublished  
36 and ongoing trials on the WHO International Clinical Trials Registry (WHO ICTRP), metaRegister of  
37 Controlled Trials (mRCT), ClinicalTrials.gov, Conference Proceedings Citation Index-Science (CPCI-S).  
38 We will also search conference abstracts from the following societies published in the last two years:  
39 American Heart Association (AHA), American College of Cardiology (ACC), European Society of  
40 Cardiology (ESC), American Society of Thoracic Surgeons (AATS), Canadian Cardiovascular Society  
41 (CCS), European Association for Cardio-Thoracic Surgery (EACTS), American Society of Anesthesiology  
42 (ASA), Society of Critical Care Medicine (SCCM), Canadian Critical Care Society (CCCS), and European  
43 Society of Intensive Care Medicine (ESICM).  
44  
45  
46  
47  
48  
49  
50  
51  
52

## 53 **Data collection and analysis**

1  
2  
3 After identifying potentially relevant articles through the search process described above, reviewers  
4 working in pairs will independently screen all citations and references using specific pre-defined eligibility  
5 criteria. We will screen in two stages: first reviewing titles and abstracts, and second reviewing the full-  
6 text. Disagreements in screening will be resolved by discussion and consensus with the help of a third  
7 reviewer if needed.  
8  
9  
10

## 11 12 13 14 **Data Extraction and Management**

15  
16 Data extraction will be done independently and in duplicate using pre-designed data abstraction forms.  
17 Abstracted data will include the study title, first author, relevant demographic data, intervention and  
18 control, results for outcomes of interest, and information on the methodological quality for each study. A  
19 third reviewer will resolve discrepancies in data extraction between reviewers.  
20  
21  
22  
23

## 24 25 26 **Assessment of risk of bias in included studies**

27  
28 Two reviewers will independently assess the risk of bias of included studies using the Cochrane  
29 Collaboration tool for assessing risk of bias in RCTs [30]. We will assess risk of bias individually for each  
30 outcome. A third reviewer will be available to resolve any disagreements. For each study, we will include  
31 a description for all domains assessed, along with comments if necessary and a final judgment. The risk  
32 of bias of a trial will be categorized as follows: (1) low risk of bias, where bias is not present or if present,  
33 unlikely to affect outcomes, (2) high risk of bias, where outcomes are likely to be significantly affected by  
34 bias, (3) unclear risk of bias, where the reported information is inadequate to properly assess bias.  
35  
36  
37  
38  
39  
40

41  
42 Included trials will be assessed for adequate sequence generation, allocation sequence concealment,  
43 blinding, selective outcome reporting, and other bias. Sequence generation will be considered adequate if  
44 the study explicitly described an appropriate randomization procedure to generate an unpredictable  
45 sequence of allocation, including computerized randomization, use of random number tables, and coin  
46 tossing. Concealment of allocation will be considered adequate if specific methods to protect allocation  
47 were documented and implemented. Performance bias will be considered low if a study reported  
48 participant, caregiver, and/or researcher blinding. Blinding of outcome assessment will be considered  
49 adequate if outcome assessors and adjudicators were blinded. Within-study selective reporting of  
50 outcomes will be examined by reviewing the a priori study protocol, if available. If the study protocol is not  
51  
52  
53  
54  
55  
56  
57  
58  
59  
60

1  
2  
3 available, we will compare the outcomes listed in the “Methods/design” section with those reported in the  
4 manuscript.  
5  
6  
7

### 8 9 **Measures of treatment effect**

10  
11 When pooling of outcome data is appropriate, RevMan 5.3 software will be used to conduct meta-  
12 analyses. We will use the method of DerSimonian and Laird to pool effect sizes for each outcome under a  
13 random effects model; study weights will be measured using the inverse variance method. We will  
14 present the results as relative risk (RR) with 95% confidence intervals (CIs) for dichotomous outcomes  
15 and as mean difference (MD) or standardized mean difference (SMD) with 95% CIs for continuous  
16 outcomes.  
17  
18  
19  
20  
21  
22

23 We plan to perform random effects analysis for all outcomes of interest. If significant unexplained  
24 heterogeneity exists, or if there is an insufficient number of RCTs for meta-analysis, we will describe data  
25 qualitatively. The number needed to treat (NNT) with 95% CIs will be derived from pooled risk ratios and  
26 its 95% CIs utilizing assumed control risk (ACR) for each outcome similar to the approach recommended  
27 by the Cochrane collaboration;  $NNT = 1/[ACR \times (1 - RR)]$  [31].  
28  
29  
30  
31  
32  
33

### 34 **Dealing with missing data**

35  
36 If we encounter missing data, we will attempt contact the study authors for additional information. If we  
37 can not obtain additional data, we will analyze the available data and report the potential impact of  
38 missing data in the discussion.  
39  
40  
41  
42

### 43 **Assessment of heterogeneity**

44  
45 We will assess for heterogeneity between studies using the chi-squared test for homogeneity, where  $p <$   
46  $0.10$  indicates substantial heterogeneity, and the  $I^2$  statistic. We consider  $I^2 > 50\%$  to be significant  
47 heterogeneity, which will be further investigated with subgroup analyses to assess clinical and  
48 methodological sources of heterogeneity in intervention effect.  
49  
50  
51  
52  
53

### 54 **Assessment of reporting biases**

1  
2  
3 We will look for potential publication bias using a funnel plot if more than ten trials are included for an  
4 outcome. For continuous outcomes, the Egger test [30] will be used to detect funnel plot asymmetry. For  
5 dichotomous outcomes, we will use the arcsine test. All analyses will be performed using RevMan or  
6 Stata.  
7  
8  
9

## 10 11 12 **Subgroup analysis and investigation of heterogeneity**

13  
14  
15 Potential and expected clinical sources of heterogeneity include different patient demographics, dosing  
16 strategies, route of administration, and type of cardiac surgery. To explore significant heterogeneity, if a  
17 sufficient number of trials are available, we will conduct the following pre-specified subgroup analyses  
18 (hypothesized direction of effect in parentheses):  
19

- 20 - Off- versus on-pump cardiac surgery (tranexamic acid is more effective in on-pump surgery)
- 21 - Type of surgery (tranexamic acid is more effective in valvular heart surgery or aortic arch/ascending
- 22 aorta surgery as compared to CABG)
- 23 - Combined procedures versus single procedure (tranexamic acid is more effective in combined
- 24 procedures)
- 25 - Urgent versus elective surgery (tranexamic acid is more effective in urgent surgeries)
- 26 - Single dose versus multiple doses and/or continuous infusion (multiple doses or continuous infusion
- 27 is more effective)
- 28 - High versus low risk for bias studies (tranexamic acid is more effective in high risk of bias studies).

29  
30 We will use the Chi-squared test for each subgroup hypothesis ( $p < 0.10$  for significance). We will conduct  
31 meta-regression to assess the effect of tranexamic dose as a continuous independent variable on the  
32 outcomes using Stata hypothesizing that higher dose is more effective. If subgroups effects are credible,  
33 we will present the outcomes separately for each subgroup.  
34  
35  
36

## 37 38 39 **Sensitivity analysis**

40 A priori sensitivity analysis will be performed, excluding studies only reported as abstracts. Post hoc  
41 sensitivity analysis will be performed if required.  
42  
43  
44

## 45 46 47 **Assessing the quality of evidence**



1  
2  
3  
4 The Grading of Recommendations Assessment, Development and Evaluation (GRADE) approach will be  
5 used to assess the quality of evidence for each outcome [32]. The GRADE system classifies the quality of  
6 the aggregate body of evidence as high, moderate, low, or very low. The evidence will be evaluated using  
7 the following criteria: (1) study design and rigor of its execution (i.e. individual study risk of bias), (2) the  
8 extent to which the evidence could be applied to patients of interest (i.e. directness), (3) the consistency  
9 of results, (4) the analysis of the results (i.e. precision), and (5) the likelihood of publication bias. The  
10 following three factors will increase the quality of evidence if present: (1) a strong or very strong  
11 association between an intervention and the observation of interest, (2) a highly statistically significant  
12 relationship between dose and effect, and (3) a plausible confounding variable that could explain a  
13 reduced effect or could explain an effect if one was not anticipated. We will summarize the overall quality  
14 of evidence for the intervention taking into consideration both desirable and adverse outcomes. We will  
15 include an evidence profile in the results showing the GRADE assessments and pooled analysis per  
16 outcome.  
17  
18  
19  
20  
21  
22  
23  
24  
25  
26

### 27 **Patient and Public Involvement:**

28 We categorized outcomes as we perceived it as clinical experts to be more patient valued into patient  
29 critical and patient important outcomes. but there were no patients involved in the process of selection.  
30  
31  
32  
33  
34  
35

## 36 **DISCUSSION**

37 Bleeding is one of the major complications of cardiac surgeries [5]. The inhibition of fibrinolysis inhibition  
38 using lysine analogues is a common approach used to reduce the intra and post-operative bleeding  
39 associated with cardiac surgery [33]. Tranexamic acid is the most common lysine analogue used in  
40 clinical use. Despite its demonstrated benefits in the prevention of bleeding. Tranexamic acid has not  
41 been shown to reduce mortality in cardiac surgery .. Despite trial level data, the balance between  
42 bleeding prevention and the hypothetical side effects of tranexamic acid remains uncertain.  
43  
44  
45  
46

47 Our systematic review and meta-analysis are intended to summarize the evidence examining the efficacy  
48 and safety of tranexamic acid in patients undergoing cardiac surgery. We will examine the effect of the  
49 type of surgery, patient population and dosing strategies. Strengths of this protocol include a  
50 comprehensive search strategy of published and unpublished literature and application of GRADE  
51 methodology to assess certainty of the estimates of effect. Limitations relate to the anticipated  
52 heterogeneity of the included studies.  
53  
54  
55  
56  
57  
58  
59  
60

1  
2  
3  
4 **Funding statement:** The author(s) received no specific funding for this work

5 **Conflict of interest:** Authors have no conflict of interest to declare.

6  
7 **Acknowledgements** We would like to express our gratitude to Sandy Culley  
8 for guidance in designing and carrying out our search strategy.  
9

10  
11 **Contributors** TA, AA, BR, CA, EB conceived the idea for this systematic review.

12 All authors (TA,AA,DX,SF,JS,EB,AF,TK,KK,RZ,RW,and BR) developed the methodology for the  
13 systematic review. The manuscript was drafted by TA,AA,DX and BR and revised by all authors. TA,AA  
14 and DX will screen potential  
15 studies perform duplicate independent data abstraction, risk of bias assessment  
16 and GRADE assessment with help from other authors. BR  
17 will conduct the data synthesis. BR is the guarantor of the review.  
18  
19  
20  
21  
22

23 **Ethics and dissemination:** Formal ethical approval is not required as primary data will not be collected.

24 The results will be disseminated through a peer-reviewed publication  
25  
26  
27  
28  
29  
30  
31  
32  
33  
34  
35  
36  
37  
38  
39  
40  
41  
42  
43  
44  
45  
46  
47  
48  
49  
50  
51  
52  
53  
54  
55  
56  
57  
58  
59  
60

## References:

1. Sullivan, M. T., Cotten, R., Read, E. J., & Wallace, E. L. (2007). Blood collection and transfusion in the United States in 2001. *Transfusion*, 47(3), 385-394.
2. Colson PH, Gaudard P, Fellahi J-L, Bertet H, Faucanie M, Amour J, et al. Active Bleeding after Cardiac Surgery: A Prospective Observational Multicenter Study. *PLoS ONE*. 2016 Sep 2;11(9):e0162396.
3. Kristensen KL, Rauer LJ, Mortensen PE, Kjeldsen BJ. Reoperation for bleeding in cardiac surgery. *Interactive Cardiovascular and Thoracic Surgery*. 2012 Jun;14(6):709-713.
4. Vivacqua A, Koch CG, Yousuf AM, Nowicki ER, Houghtaling PL, Blackstone EH, Sabik JF 3rd. Morbidity of bleeding after cardiac surgery: is it blood transfusion, reoperation for bleeding, or both? *Ann Thorac Surg*. 2011 Jun;91(6): 1780-90.
5. Paparella D et al. Activation of the coagulation system during coronary artery bypass grafting: comparison between on-pump and off-pump techniques. *J Thorac Cardiovasc Surg*. 2006 Feb;131(2):290-7.
6. Ickx BE, Faraoni D. Management of the clotting system: a European perspective. *Curr Opin Anaesthesiol*. 2012 Feb;25(1): 80-85.
7. Hess PJ Jr. Systemic inflammatory response to coronary artery bypass graft surgery. *Am J Health Syst Pharm*. 2005 Sep 15;62:S6-S9.
8. Pagano D, Milojevic M, Meesters MI, Benedetto U, Bolliger D, Von Heymann C, Jeppsson A, Koster A, Osnabrugge RL, Ranucci M, Ravn HB, Vonk ABA, Wahba A, Boer C. 2017 EACTS/EACTA Guidelines on patient blood management for adult cardiac surgery. *Eur J Cardiothorac Surg* 2018 Jan 1;53(1):79-111.
9. Ker, K., Edwards, P., Perel, P., Shakur, H., & Roberts, I. (2012). Effect of tranexamic acid on surgical bleeding: systematic review and cumulative meta-analysis. *Bmj*, 344, e3054.
10. CRASH-2 trial collaborators. Effects of tranexamic acid on death, vascular occlusive events, and blood transfusion in trauma patients with significant haemorrhage (CRASH-2). *The Lancet*. 2010 Jul;376(9734):23-32.
11. Ferraris et al .2011 Update to The Society of Thoracic Surgeons and the Society of Cardiovascular Anesthesiologists Blood Conservation Clinical Practice Guidelines. *Ann Thorac Surg* 2011Mar;91(3):944-82.
12. Dunn CJ, Goa KL. Tranexamic acid: a review of its use in surgery and other indications. *Drugs*. 1999 Jun;57(6):1005-32.
13. Lukes AS et al. Tranexamic acid for heavy menstrual bleeding. *Obstetrics & Gynecology*. 2010 Oct;116(4):865-75.
14. Sukeik M, Alshryda S, Haddad FS, Mason JM. Systematic review and meta-analysis of the use of tranexamic acid in total hip replacement. *J Bone Joint Surg Br*. 2011 Jan;93(1):39-46.
15. Morrison JJ, Dubose JJ, Rasmussen TE, Midwinter MJ. Military Application of Tranexamic Acid in Trauma Emergency Resuscitation (MATTERs) Study. *Arch Surg*. 2012 Feb;147(2):113-119.
16. Brown JR, Birkmeyer NJ, O'Connor GT. Meta-analysis comparing the effectiveness and adverse outcomes of antifibrinolytic agents in cardiac surgery. *Circulation*. 2007 Jun;115(22):2801-13.
17. Sharma V, Katznelson R, Jerath A, Garrido-Olivares L, Carroll J, Rao V, Wasowicz M, Djaiani G. The association between tranexamic acid and convulsive seizures after cardiac surgery: a multivariate analysis in 11 529 patients. *Anaesthesia* 2014 Feb;69(2):124-30.

18. Koster A, Börgermann J, Zittermann A, Lueth JU, Gillis-Januszewski T, Schirmer U. Moderate dosage of tranexamic acid during cardiac surgery with cardiopulmonary bypass and convulsive seizures: incidence and clinical outcome. *Br J Anaesth*. 2013 Jan;110(1):34–40.
19. Zhou, Zhen-feng, Feng-jiang Zhang, Yang-fan Huo, Yun-xian Yu, Li-na Yu, Kai Sun, Li-hong Sun, Xiu-fang Xing, and Min Yan. "Intraoperative tranexamic acid is associated with postoperative stroke in patients undergoing cardiac surgery." *PloS one* 12, no. 5 (2017): e0177011.
20. ATACAS Investigators. Tranexamic acid in patients undergoing coronary-artery surgery. *N Engl J Med* 2017 Jan;376(2):136-48.
21. Michael A. Borger, Joan Ivanov, Richard D. Weisel, Vivek Rao, Charles M. Peniston; Stroke during coronary bypass surgery: principal role of cerebral macroemboli. *European Journal of Cardio-Thoracic Surgery*. 2001 May;19(5):627–632.
22. Sander M et al. Mortality associated with administration of high-dose tranexamic acid and aprotinin in primary open-heart procedures: a retrospective analysis. *Critical Care* 2010;14(4):R148.
23. Sigaut S, Tremey B, Ouattara A, Couturier R, Taberlet C, Grassin-Delyle S, Dreyfus JF, Schlumberger S, Fischler M. Comparison of two doses of tranexamic acid in adults undergoing cardiac surgery with cardiopulmonary bypass. *Anesthesiology* 2014 Mar;120(3):590-600.
24. Waldow T, Szlapka M, Haferkorn M, Bürger L, Plötze K, Matschke K. Prospective clinical trial on dosage optimizing of tranexamic acid in non-emergency cardiac surgery procedures. *Clin Hemorheol Microcirc* 2013 Jan;55(4):457-68.
25. McCormack, P.L. Tranexamic Acid: A review of its Use in the Treatment of Hyperfibrinolysis. *Drugs*. 2012 Mar;72(5):585–617
26. Amy L. Cilia La Corte, Helen Philippou, Robert A.S. Ariëns. Role of Fibrin Structure in Thrombosis and Vascular Disease. *Advances in Protein Chemistry and Structural Biology*. 2011;83: 75-127.
27. Sniecinski RM, Chandler WL. Activation of the hemostatic system during cardiopulmonary bypass. *Anesth Analg*. 2011 Dec;113(6):1319-33.
28. McIlroy DR, Myles PS, Phillips LE, Smith JA. Antifibrinolytics in cardiac surgical patients receiving aspirin: a systematic review and meta-analysis. *Br J Anaesth*. 2009 Feb;102(2):168–78.
29. Dai Z, Chu H, Wang S, Liang Y. The effect of tranexamic acid to reduce blood loss and transfusion on off-pump coronary artery bypass surgery: A systematic review and cumulative meta-analysis. *J Clin Anesth*. 2018 Feb;44:23-31.
30. Higgins JP, Altman DG, Gøtzsche PC, Jüni P, Moher D, Oxman AD, et al. The Cochrane Collaboration's tool for assessing risk of bias in randomised trials. *BMJ*. 2011;343:d5928.
31. Higgins JPT, Green S, eds. *Cochrane Handbook for Systematic Reviews of Interventions* Version 5.1.0 [updated March 2011]. The Cochrane Collaboration, 2011. Available from [www.cochrane-handbook.org](http://www.cochrane-handbook.org).
32. Guyatt GH, Oxman AD, Vist GE, Kunz R, Falck-Ytter Y, Alonso-Coello P, et al. GRADE: an emerging consensus on rating quality of evidence and strength of recommendations. *BMJ*. 2008;336 (7650):924–6.
33. Katsaros D et al. Tranexamic acid reduces postbypass blood use.. *Ann Thorac Surg*. 1996 Apr;61(4):1131-5.

1  
2  
3  
4  
5  
6  
7  
8  
9  
10  
11  
12  
13  
14  
15  
16  
17  
18  
19  
20  
21  
22  
23  
24  
25  
26  
27  
28  
29  
30  
31  
32  
33  
34  
35  
36  
37  
38  
39  
40  
41  
42  
43  
44  
45  
46  
47  
48  
49  
50  
51  
52  
53  
54  
55  
56  
57  
58  
59  
60

For peer review only

Database: Embase <1974 to 2018 September 10> Search Strategy:

1 1 exp antifibrinolytic agent/ (28330)  
 2 2 (anti-fibrinolytic\* or antifibrinolytic\* or antifibrinolysin\* or anti-fibrinolysin\* or antiplasmin\* or antiplasmin\* or ((plasmin  
 3 or fibrinolysis) adj3 inhibitor\*)).mp. (13957)  
 4 3 exp aprotinin/ (11678)  
 5 4 (Aprotinin\* or kallikrein-trypsin inactivator\* or bovine kunitz pancreatic trypsin inhibitor\* or bovine pancreatic trypsin  
 6 inhibitor\* or basic pancreatic trypsin inhibitor\* or BPTI or contrykal or kontrykal or kontrikal or contrical or dilmintal or  
 7 iniprol or zymofren or traskolan or antilysin or pulmin or amicar or caprocid or epsamon or epsikapron or antilysin or iniprol  
 8 or kontrikal or kontrykal or pulmin\* or Trasylol or Antilysin Spofa or rp?9921 or antagosan or antilysin or antilyline or  
 9 apronitin\* or apronitrine or bayer a?128 or bovine pancreatic secretory trypsin inhibitor\* or contrycal or frey inhibitor\* or  
 10 gordox or kallikrein trypsin inhibitor\* or kazal type trypsin inhibitor\* or (Kunitz adj3 inhibitor\*) or midran or (pancrea\* adj2  
 11 antitrypsin) or (pancrea\* adj2 trypsin inhibitor\*) or riker?52g or rp?9921or tracylol or trascolan or trasilol or traskolan or  
 12 trazylol or zymofren or zymophren).mp. (15442)  
 13 5 exp tranexamic acid/ (10966)  
 14 6 (tranexamic or Cyclohexanecarboxylic Acid\* or Methylamine\* or amcha or trans-4-aminomethylcyclohexanecarboxylic  
 15 acid\* or t-amcha or amca or kabi 2161 or transamin\* or exacyl or amchafibrin or anvitoff or spotof or cyklokapon or ugurol  
 16 or amino methylcyclohexane carboxylate or aminomethylcyclohexanecarbonic acid or aminomethylcyclohexanecarboxylic  
 17 acid or AMCHA or amchafibrin or amikapron or aminomethyl cyclohexane carboxylic acid or aminomethyl  
 18 cyclohexanecarboxylic acid or aminomethylcyclohexane carbonic acid or aminomethylcyclohexane carboxylic acid or  
 19 aminomethylcyclohexanecarbonic acid or aminomethylcyclohexanecarboxylic acid or aminomethylcyclohexanecarboxylic  
 20 acid or aminomethylcyclohexanoic acid or amstat or anvitoff or cl?65336 or cl65336 or cyclocapron or cyclokapon or  
 21 cyclocapron or exacyl or frenolyse or hexacapron or hexakapron or tranex or TXA).mp. (58514)  
 22 7 exp Aminocaproic Acids/ or exp 6-Aminocaproic Acid/ (5997)  
 23 8 (((aminocaproic or amino?caproic or aminohexanoic or amino?hexanoic or epsilon-aminocaproic or E-aminocaproic)  
 24 adj2 acid\*) or epsikapron or cy-116 or cy116 or epsamon or amicar or caprocid or lederle or Aminocaproic or  
 25 aminohexanoic or amino caproic or amino n hexanoic or acikaprin or afibrin or capracid or capramol or caprogel or  
 26 caprolest or caprolisine or caprolysin or capromol or cl 10304 or EACA or eaca roche or ecapron or ekaprol or epsamon  
 27 or epsicapron or epsilcapramin or epsilon amino caproate or epsilon aminocaproate or epsilonaminocaproic or  
 28 etha?aminocaproic or ethaaminocaproich or emocaprol or hepin or ipsilon or jd?177or neocaprol or nsc?26154 or  
 29 tachostyptan).mp. (16163)  
 30 9 1 or 2 or 3 or 4 or 5 or 6 or 7 or 8 (95478)  
 31 10 exp cardiovascular surgery/ (612911)  
 32 11 exp heart surgery/ (325152)  
 33 12 exp heart valve surgery/ (82677)  
 34 13 exp thorax surgery/ (524265)  
 35 14 exp coronary artery surgery/ (114219)  
 36 15 exp coronary artery bypass graft/ (67199)  
 37 16 exp coronary artery bypass surgery/ (15326)  
 38 17 exp thorax/su [Surgery] (1103)  
 39 18 exp coronary artery bypass/ (67199)  
 40 19 exp sternotomy/ (17164)  
 41 20 exp sternum/su [Surgery] (877)  
 42 21 exp heart valve/su [Surgery] (3320)  
 43 22 exp off pump coronary surgery/ (5258)  
 44 23 (exp heart/ or exp heart valve/ or exp heart disease/ or exp coronary artery disease/) and (su.fs. or surgery.mp. or  
 45 surgeries.mp. or surgical.mp. or operate.mp. or operation.mp. or operations.mp. or bypass.mp. or stent\*.mp. or graft\*.mp.  
 46 or repair.mp.) (493732)  
 47 24 ((heart or cardiac or coronary or cardiothoracic or cardio-thoracic or thoracic or cardio-pulmonary or  
 48 cardiopulmonary or aortic or mitral or arch or on pump or off pump) adj3 (surgery or surgeries or surgical or operate or  
 49 operation or operations or bypass or stent\* or graft\*)).mp. (330250)  
 50 25 (coronary artery bypass or coronary artery surgery or coronary bypass graft surgery or coronary artery bypass graft  
 51 or coronary bypass graft or coronary artery bypass graft\* or coronary artery bypass graft\* or coronary artery graft\* or  
 52 CABG).mp. (100527)  
 53 26 10 or 11 or 12 or 13 or 14 or 15 or 16 or 17 or 18 or 19 or 20 or 21 or 22 or 23 or 24 or 25 (1056258)  
 54 27 9 and 26 (6799)  
 55 28 randomi?ed.ab,ti,kw. or randomized controlled trial.pt. or controlled clinical trial.pt. or placebo.ab,ti,kw. or clinical  
 56 trials as topic.sh. or random\*.ab,ti,kw. or trial.ti. (1500424)  
 57 29 (crossover procedure or double-blind procedure or randomized controlled trial or single-blind procedure).de. or  
 58 ((((((random\* or factorial\* or crossover\* or cross over\* or placebo\* or assign\* or allocat\* or volunteer\* or singl\*) adj1 blind\*)  
 59 or cross) adj1 over\*) or doubl\*) adj1 blind\*).de,ab,ti. (639992)  
 60 30 28 or 29 (1622208)  
 31 9 and 26 and 30 (1237)

\*\*\*\*\*

- 1
- 2
- 3
- 4
- 5
- 6
- 7
- 8
- 9
- 10
- 11
- 12
- 13
- 14
- 15
- 16
- 17
- 18
- 19
- 20
- 21
- 22
- 23
- 24
- 25
- 26
- 27
- 28
- 29
- 30
- 31
- 32
- 33
- 34
- 35
- 36
- 37
- 38
- 39
- 40
- 41
- 42
- 43
- 44
- 45
- 46
- 47
- 48
- 49
- 50
- 51
- 52
- 53
- 54
- 55
- 56
- 57
- 58
- 59
- 60

For peer review only

**PRISMA-P (Preferred Reporting Items for Systematic review and Meta-Analysis Protocols) 2015 checklist: recommended items to address in a systematic review protocol\***

| Section and topic                 | Item No | Checklist item                                                                                                                                                                                                                           | Page Number |
|-----------------------------------|---------|------------------------------------------------------------------------------------------------------------------------------------------------------------------------------------------------------------------------------------------|-------------|
| <b>ADMINISTRATIVE INFORMATION</b> |         |                                                                                                                                                                                                                                          |             |
| Title:                            |         |                                                                                                                                                                                                                                          |             |
| Identification                    | 1a      | Title : Tranexamic Acid in Cardiac Surgery: a systematic review and meta-analysis (protocol)                                                                                                                                             | Page 1      |
| Update                            | 1b      | N/A                                                                                                                                                                                                                                      |             |
| Registration                      | 2       | PROSPERO registration number CRD42018105904                                                                                                                                                                                              | Pg 2        |
| Authors:                          |         |                                                                                                                                                                                                                                          |             |
| Contact                           | 3a      | Provided name, institutional affiliation, e-mail address of all protocol authors; provide physical mailing address of corresponding author                                                                                               | Page 1      |
| Contributions                     | 3b      | Describe contributions of protocol authors and identify the guarantor of the review                                                                                                                                                      | Page 8      |
| Amendments                        | 4       | N/A                                                                                                                                                                                                                                      |             |
| Support:                          |         |                                                                                                                                                                                                                                          |             |
| Sources                           | 5a      | The author(s) received no specific funding for this work                                                                                                                                                                                 | Pg 2,8      |
| Sponsor                           | 5b      | N/A                                                                                                                                                                                                                                      |             |
| Role of sponsor or funder         | 5c      | N/A                                                                                                                                                                                                                                      |             |
| <b>INTRODUCTION</b>               |         |                                                                                                                                                                                                                                          |             |
| Rationale                         | 6       | Rationale intended to summarize the evidence examining the efficacy and safety of TXA in cardiac surgery in abstract pg 2 and under why it is important to do this review pages 3 and 4                                                  | Pg2-4       |
| Objectives                        | 7       | PICO question was explained under Methods/Design on page 4 under types of studies ,participants, intervention and comparator and outcome measures                                                                                        | Pg 4        |
| <b>METHODS</b>                    |         |                                                                                                                                                                                                                                          |             |
| Eligibility criteria              | 8       | explained under Methods/Design on page 4 under types of studies, participants, intervention and comparator and outcome measures                                                                                                          | Page 4      |
| Information sources               | 9       | Describe all intended information sources (such as electronic databases, contact with study authors, trial registers or other grey literature sources) with planned dates of coverage under search methods and searching other resources | Pg.4-5      |
| Search strategy                   | 10      | Uploaded separately as a supplementary document “EMBASE search strategy”                                                                                                                                                                 | Suppl       |
| Study records:                    |         |                                                                                                                                                                                                                                          |             |



|                                    |     |                                                                                                                    |          |
|------------------------------------|-----|--------------------------------------------------------------------------------------------------------------------|----------|
| Data management                    | 11a | Described under data collection and analysis                                                                       | Page 5   |
| Selection process                  | 11b | Under data collection and analysis                                                                                 | Page 5   |
| Data collection process            | 11c | method of extracting data from reports was mentioned under data collection and analysis                            | Pg 5     |
| Data items                         | 12  | General data items were described under data extraction and analysis                                               | Page 5   |
| Outcomes and prioritization        | 13  | Described under type of outcome measures                                                                           | Page 4   |
| Risk of bias in individual studies | 14  | methods for assessing risk of bias of individual studies under assessment of risk of bias in included studies      | Page 5-6 |
| Data synthesis                     | 15a | Explained under Measures of treatment effect pg6 and subgroup analysis and investigation of heterogeneity page 6-7 | Page 6-7 |
|                                    | 15b | explained under Measures of treatment effect                                                                       | Page 6   |
|                                    | 15c | Was explained under subgroup analysis and investigation of heterogeneity                                           | Page 6   |
|                                    | 15d | explained under Measures of treatment effect                                                                       | Page 6   |
| Meta-bias(es)                      | 16  | Under Assessment of risk of bias pg5, Assessment of reporting biases pg 6, assessing quality of evidence pg7       | Page 5-7 |
| Confidence in cumulative evidence  | 17  | Under assessing quality of evidence                                                                                | Page 7   |

**\* It is strongly recommended that this checklist be read in conjunction with the PRISMA-P Explanation and Elaboration (cite when available) for important clarification on the items. Amendments to a review protocol should be tracked and dated. The copyright for PRISMA-P (including checklist) is held by the PRISMA-P Group and is distributed under a Creative Commons Attribution Licence 4.0.**

*From: Shamseer L, Moher D, Clarke M, Ghersi D, Liberati A, Petticrew M, Shekelle P, Stewart L, PRISMA-P Group. Preferred reporting items for systematic review and meta-analysis protocols (PRISMA-P) 2015: elaboration and explanation. BMJ. 2015 Jan 2;349(jan02 1):g7647.*
