# Supplementary material for: Tranexamic acid in cardiac surgery: a systematic review and meta-analysis (protocol)
Source: PubMed Central journal article supplement — BMJ Open. 2019 Sep 17;9(9):e028585. doi: 10.1136/bmjopen-2018-028585 (PMC6756438; doi:10.1136/bmjopen-2018-028585), 2019-09-17
Supplement: bmjopen-2018-028585supp001.pdf [file bmjopen-2018-028585supp001.pdf]

\*\*\*\*\*
